# Supplementary material
Source: PubMed Central journal article supplement (PMC7114156)
Supplement: mmc1.pdf [file mmc1.pdf]

### Description of Cells Used in this Study

| Cell name                                      | Cell type                                          | Source              | Medium             | Reference                                                                                             |
|------------------------------------------------|----------------------------------------------------|---------------------|--------------------|-------------------------------------------------------------------------------------------------------|
| Human keratinocyte (HKC)                       | Primary keratinocyte                               | Cambrex CC-2503     | KGM                |                                                                                                       |
| HFF                                            | Primary fibroblast                                 | Cambrex CC-2509     | DMEM               |                                                                                                       |
| WI-38                                          | Primary fibroblast                                 | ATCC CCL-75         | MEM                |                                                                                                       |
| WI-38 AV                                       | Fibroblast, integrated SV40                        | ATCC CCL-75x        | MEM                |                                                                                                       |
| Human umbilical vein endothelial cells (HUVEC) | Primary endothelial                                | Cambrex CC-2517     | EGM MV             |                                                                                                       |
| Peripheral blood mononuclear cells (PBMC)      | Primary lymphocyte                                 | Materials & Methods | RPMI 1640, 20% FBS | Ferris, R. G., et al. 2005. Antimicrob. Agents Chemother. 49:4046-4051.                               |
| B cells                                        | Primary lymphocyte                                 | Materials & Methods | RPMI 1640, 20% FBS |                                                                                                       |
| CD4 T cells                                    | Primary lymphocyte                                 | Materials & Methods | RPMI 1640, 20% FBS |                                                                                                       |
| Erythroid                                      | Bone marrow progenitor cells                       | Materials & Methods |                    | Eaves, C. J. 1995. In: E. Beutler et al. (eds.), Williams Hematology, p. L22-L26.                     |
| Granulocyte / Macrophage                       | Bone marrow progenitor cells                       | Materials & Methods |                    | Eaves, C. J. 1995. In: E. Beutler et al. (eds.), Williams Hematology, p. L22-L26.                     |
| W12 (W12-20850)                                | Keratinocyte, episomal HPV 16, CIN 1               | Dr Paul Lambert     | W12                | Jeon, S. et al. 1995. J. Virol. 69:2989-2997. Stanley, M. A. et al. 1989. Int. J. Cancer: 43:672-676. |
| W12 20861                                      | Keratinocyte, integrated HPV 16                    | Dr Paul Lambert     | W12                | Jeon, S. et al. 1995. J. Virol. 69:2989-2997.                                                         |
| CIN612                                         | Keratinocyte, episomal HPV 31, CIN 1               | Dr Lou Laimins      | E                  | Bedell, M. A., et al. 1991. J. Virol. 65:2254-2260.                                                   |
| HKC/HPV16                                      | Keratinocyte, episomal HPV 16                      | Dr John Lee         | E                  | Lee, J. H., et al. 2004. PNAS 101:2094-2099.                                                          |
| SiHa                                           | Keratinocyte, cervical carcinoma, integrated HPV16 | ATCC HTB-35         | W12                |                                                                                                       |
| Caski                                          | Keratinocyte, cervical carcinoma, integrated HPV16 | ATCC CRL-1550       | W12                |                                                                                                       |

|              |                                                                      |                                                   |           |                                               |
|--------------|----------------------------------------------------------------------|---------------------------------------------------|-----------|-----------------------------------------------|
| HeLa         | Keratinocyte, cervical carcinoma, integrated HPV18                   | ATCC CCL-2                                        | W12       |                                               |
| Vero         | Kidney epithelial, African Green monkey                              | ATCC CCL-81                                       | MEM       |                                               |
| HEK293       | Kidney epithelial, transformed with adenovirus 5                     | ATCC-CRL-1573                                     | DMEM      | Louis, N., et al. 1997. Virology 233:423-429. |
| HEK293-IFIT1 | HEK293 stably transfected with IFIT1 promoter controlling luciferase | Derrick Maley, GSK                                | DMEM      |                                               |
| Huh7         | Liver epithelial                                                     | Jane Rosemund, GSK                                | DMEM      |                                               |
| Jurkat       | T lymphoblast, leukemia                                              | ATCC TIB-152                                      | RPMI 1640 |                                               |
| Molt4        | T lymphoblast, leukemia                                              | ATCC CRL-1582                                     | RPMI 1640 |                                               |
| U937         | Monocyte, histiocytic lymphoma                                       | ATCC CRL-1593.2                                   | RPMI 1640 |                                               |
| BJAB         | B lymphoblast, Burkitt's lymphoma, EBV -ve                           | Ruth J Mayer, GSK                                 | RPMI 1640 |                                               |
| Namalwa      | B lymphoblast, integrated EBV                                        | ATCC CRL-1432                                     | RPMI 1640 | Lawrence, J. B. et al. 1988. Cell 52:51-61.   |
| IM9          | B lymphoblastoid, episomal EBV                                       | ATCC CCL-159                                      | RPMI 1640 |                                               |
| B-LCL 5/2/1  | B lymphoblastoid, episomal EBV                                       | Materials & Methods                               | RPMI 1640 |                                               |
| MT4          | T lymphoblast, leukemia, HTLV-1 +ve                                  | NIH AIDS Research & Reference Program<br>Cat# 120 | RPMI 1640 | Miyoshi, I., et al. 1981. Nature 294:770-771. |

**PRIMERS FOR DNA PCR**

| <b>Organism</b>         | <b>Gene Symbol</b> | <b>Gene Description</b> | <b>Forward Primer</b>                   | <b>Reverse Primer</b>                   | <b>Probe</b>                                      |
|-------------------------|--------------------|-------------------------|-----------------------------------------|-----------------------------------------|---------------------------------------------------|
| Human papillomavirus 16 | E1                 |                         | 5'-TAC AGG TTC TAA AAC GAA AGT-3'       | 5'-TTC CAC TTC AGT ATT GCC ATA-3'       | 5'-ATA ATC TCC TTT TTG CAG CTC TAC TTT GTT TTT-3' |
| Human papillomavirus 31 | E1                 |                         | 5'-CAG AGA CAG CAC AGG CAT TGT T-3'     | 5'-TGC ACA GCC TCT GCATGT TC-3'         | 5'-TGC ACA GGA AGC GGA GG-3'                      |
| Homo sapiens            | ACTA1              | Actin, alpha 1          | 5'-TCA CCC ACA CTG TGC CCA TCT ACG A-3' | 5'-CAG CGG AAC CGC TCA TTG CCA ATG G-3' | 5'-ATG CCC TCC CCC ATG CCA TCC TGC G-3'           |
| Epstein Barr virus      | EBNA-1             |                         | 5'-GCC GGT GTG TTC GTA TAT GG-3'        | 5'-CAA AAC CTC AGC AAA TAT ATG GA-3'    | 5'-TCT CCC CTT TGG AAT GGC CCC TG-3'              |
| Simiam virus 40         | LTAg               |                         | 5'-GTC TTC TAC CTT TCT CTT CTT T-3'     | 5'-GGA GCA GTG GTG GAA-3'               | 5'-TGG AGG AGT AGA ATG TTG AGA GTC A-3'           |
| Adenovirus 5            | Hexon              |                         | 5'-CTT CTC TAC GCC AAC TCC GC-3'        | 5'-CTT CTC TAC GCC AAC TCC GC-3'        | 5'-TTG AGG TGG ATC CCA TGG ACG AGC-3'             |

## Complete Pathway Gene Set († Gene Description, PCR primers and probes)

| Gene ID | HUGO Name | Gene Aliases                                   | Gene Description                                        | GenBank Accession                                                                             | Forward Primer           | Reverse Primer            | Probe                            |
|---------|-----------|------------------------------------------------|---------------------------------------------------------|-----------------------------------------------------------------------------------------------|--------------------------|---------------------------|----------------------------------|
| 19      | ABCA1     | TGD, ABC1, CERP, HDLDT1, Tangier               | ATP-binding cassette, sub-family A (ABC1), member 1     | NM_005502                                                                                     | TGCCAAGGACCAAAGTG<br>ATG | TGTGAGAACTGCAACGT<br>CCAC | GACCTCTCATTACACAAA<br>AACCAGACA  |
| 20      | ABCA2     | ABC2, KIAA1062                                 | ATP-binding cassette, sub-family A (ABC1), member 2     | NM_001606                                                                                     | ACTTGTGGCAGACGAGC<br>CC  | CGTGTGAAGGACAGCT<br>GGG   | GAGGGCCTCATCAGCTT<br>CGAGGAGGAG  |
| 21      | ABCA3     | ABC3, ABC-C, EST111653                         | ATP-binding cassette, sub-family A (ABC1), member 3     | NM_001089                                                                                     | TGGAAGATGAGCACCAA<br>GGC | GGAGTAGTCGTCCACGC<br>CG   | ACCTCAGCTGGGCGAAG<br>GTTTTCGGTA  |
| 24      | ABCA4     | FFM, ABCR, RP19, STGD, ABC10, STGD1, Stargardt | ATP-binding cassette, sub-family A (ABC1), member 4     | NM_000350                                                                                     | CCTCTCCCACAAGGACA<br>GCC | CTCGAGGGTGCAGAGG<br>GAG   | TCAGTCACACAGACCAC<br>ACTGGACCAGG |
| 5243    | ABCB1     | MDR1, P-GP, PGY1, ABC20, GP170                 | ATP-binding cassette, sub-family B (MDR/TAP), member 1  | NM_000927                                                                                     | AGCCCTGGACAAAGCCA<br>GAG | CGTGCCATGCTCCTTGA<br>CTC  | CATTGTGATTGCTCACC<br>GCCTGTCCAC  |
| 8647    | ABCB11    | BSEP, PGY4, SPGP, ABC16, PFIC2, PFIC-2         | ATP-binding cassette, sub-family B (MDR/TAP), member 11 | NM_003742                                                                                     | ACAAAGCCAGAGAGGGT<br>CGG | CCTGTGCCATGACAGCA<br>ATG  | CATTGTCATTGCCCATC<br>GCTTGTCCAC  |
| 5244    | ABCB4     | MDR3, PGY3, ABC21, MDR2/3, PFIC-3              | ATP-binding cassette, sub-family B (MDR/TAP), member 4  | NM_000443,<br>NM_018849,<br>NM_018850                                                         | AGCCCTGGACAAAGCCA<br>GAG | CGTGCCATGCTCCTTGA<br>CTC  | CATTGTGATTGCTCACC<br>GCCTGTCCAC  |
| 22      | ABCB7     | ABC7, ASAT, ATM1P, EST140535                   | ATP-binding cassette, sub-family B (MDR/TAP), member 7  | NM_004299                                                                                     | CCCACCATGGTTTGCTT<br>GC  | ATCATGGTTCTGCACAC<br>GGC  | ATTCAGAAATGTGGCATA<br>CACAGAGCA  |
| 4363    | ABCC1     | MRP, ABCC, GS-X, MRP1, ABC29                   | ATP-binding cassette, sub-family C (CFTR/MRP), member 1 | NM_004996,<br>NM_019862,<br>NM_019898,<br>NM_019899,<br>NM_019900,<br>NM_019901,<br>NM_019902 | GAACCTGGACCCATTCA<br>GCC | CGCCTTCTGCACATTCAT<br>GG  | CGGATGAAGAAGTCTGG<br>ACGTCCCTGG  |
| 1244    | ABCC2     | DJS, MRP2, cMRP, ABC30, CMOAT                  | ATP-binding cassette, sub-family C (CFTR/MRP), member 2 | NM_000392                                                                                     | GGCTGCACACCATCATG<br>GAC | TCAATGCCAGCTTCCTTA<br>GCC | GCGGCAGCCCTGAAGAA<br>CTGCTACAAA  |
| 8714    | ABCC3     | MLP2, MRP3, ABC31, CMOAT2, MOAT-D, EST90757    | ATP-binding cassette, sub-family C (CFTR/MRP), member 3 | NM_003786,<br>NM_020037,<br>NM_020038                                                         | TACCATCCGCACCCAGT<br>TTG | TGCAATGAGGTTGGCTG<br>GAG  | TACCTGCACTGTCTGTA<br>CCATCGCACA  |
| 368     | ABCC6     | ARA, PXE, MLP1, MRP6, ABC34, MOATE, EST349056  | ATP-binding cassette, sub-family C (CFTR/MRP), member 6 | NM_001171                                                                                     | AGCTCCTGTGTCTGGCA<br>CG  | CAGCTCCCGAGCATGGC         | ACCCAGATCCTCATCCT<br>GGACGAGGCT  |

|       |       |                                             |                                                                         |                                                       |                         |                          |                                |
|-------|-------|---------------------------------------------|-------------------------------------------------------------------------|-------------------------------------------------------|-------------------------|--------------------------|--------------------------------|
| 6833  | ABCC8 | HI, SUR, MRP8, PHHI, SUR1, ABC36, HRINS     | ATP-binding cassette, sub-family C (CFTR/MRP), member 8                 | NM_000352                                             | GGTGGTGATGACAGCCTTCG    | CGCTTCAGGACGATCACAG      | CGAGTGCACACCATCCTGAGTGCAGAC    |
| 10060 | ABCC9 | SUR2, ABC37                                 | ATP-binding cassette, sub-family C (CFTR/MRP), member 9                 | NM_005691, NM_020297, NM_020298                       | TGACAATGGCTCACCGTGTC    | GGCGAACAAATTTGGGACAG     | TGCAGGCCTTGTTTTAGTCTTTTCTGAGGG |
| 215   | ABCD1 | ALD, AMN, ALDP, ABC42, adrenoleukodystrophy | ATP-binding cassette, sub-family D (ALD), member 1                      | NM_000033                                             | CATTCCCAAGATGCAGCGG     | AGGTGGAGGCACCCTGGAG      | CTCCAGGAGCTCTGCCAGATCCTGGG     |
| 225   | ABCD2 | ALDR, ABC39, ALDL1, ALDRP                   | ATP-binding cassette, sub-family D (ALD), member 2                      | NM_005164                                             | AGGAGGTTGGCGCTTTGAAC    | CATAGTTCATTGAGTCTCTGCTGC | AATCTCAGCTAGCTGGATTCCCAAAA     |
| 5825  | ABCD3 | ABC43, PMP70, PXMP1                         | ATP-binding cassette, sub-family D (ALD), member 3                      | NM_002858                                             | TTGTGCGAAAGGTTGGCAATCAC | TTCATAGTTGCCTCTGCCATCC   | TTGGAAACATCATGAGTACTACCTGCA    |
| 5826  | ABCD4 | P70R, P79R, ABC41, PMP69, PXMP1L, EST352188 | ATP-binding cassette, sub-family D (ALD), member 4                      | NM_005050, NM_020323, NM_020324, NM_020325, NM_020326 | AAGCCACCAGTGCCCTGAC     | TTCTCAAGGCTCTGCCGATG     | AGCAGCTGGGGATGACGTTCATCAGTG    |
| 9619  | ABCG1 | ABC8, WHITE1                                | ATP-binding cassette, sub-family G (WHITE), member 1                    | NM_004915, NM_016818                                  | GTGACATCGACGAGACGTGC    | AATAGGCAATGAGGCGGAGG     | CACTTCCAGAAGTCGGAGGCCATCCTG    |
| 64137 | ABCG4 | WHITE2                                      | ATP-binding cassette, sub-family G (WHITE), member 4                    | NM_022169                                             | CATGGACTTCCTGGTCTTGGG   | ACTTGACCCGGTAACGCAGC     | ATCTTCTTCTAGCCCTGCGGCTGCTG     |
| 64240 | ABCG5 |                                             | ATP-binding cassette, sub-family G (WHITE), member 5 (sterolin 1)       | NM_022436                                             | TGTGGCAGCTCAAATGTTCTG   | TCTAGATGTTGCACCTGGGC     | TCCAATGTGTGCCTTCACTCAAGGAATTCA |
| 64241 | ABCG8 |                                             | ATP-binding cassette, sub-family G (WHITE), member 8 (sterolin 2)       | NM_022437                                             | ATGCCTCTCGGGAACCTCAC    | GCTGAGGCCAATGACGATG      | TCCTCAGTGTGATGGAGCTGGACTCGT    |
| 31    | ACACA | ACC, ACAC, ACC1                             | acetyl-Coenzyme A carboxylase alpha                                     | NM_000664                                             | TCAAGCAAATCCGCAGCTTG    | CCCCTGAGTGGGTGATATG      | AGGCCAATCCAGAGGTTGCCATGGATT    |
| 32    | ACACB | ACC2, ACCB, HACC275                         | acetyl-Coenzyme A carboxylase beta                                      | NM_001093                                             | GCTCCACCATCCGTGAGAAC    | ATCACACAGTCCACGGCAC      | CATCCGAGGCCTGGTTGAAGAAAACCC    |
| 34    | ACADM | MCAD                                        | acyl-Coenzyme A dehydrogenase, C-4 to C-12 straight chain               | NM_000016                                             | TGCAGATACTTGGAGGCAATGG  | TTGTCAATGTGTTACAGGGC     | TCCTGTAGAAAACTAATGAGGGATGCCA   |
| 35    | ACADS | SCAD                                        | acyl-Coenzyme A dehydrogenase, C-2 to C-3 short chain                   | NM_000017                                             | GGGCTACGTGACAGAGATGCC   | CCGGTAGCTCCTGAGCAGATG    | GATCTACGAGGGCACCA GCGAAATCCA   |
| 38    | ACAT1 | T2, MAT, ACAT, THIL                         | acetyl-Coenzyme A acetyltransferase 1 (acetoacetyl Coenzyme A thiolase) | NM_000019                                             | TCTGGAGCCAGGATTGTG      | ATGGCAGAAGCACCTCTCC      | TGAAGCAAGGAGAATACGGTCTTGCCA    |

|      |        |                              |                                                                                                 |                      |                         |                        |                               |
|------|--------|------------------------------|-------------------------------------------------------------------------------------------------|----------------------|-------------------------|------------------------|-------------------------------|
| 39   | ACAT2  |                              | acetyl-Coenzyme A acetyltransferase 2 (acetoacetyl Coenzyme A thiolase)                         | NM_005891            | CTTGGAGCATCTGGCTGTCG    | TTGCTATTCCCATCCCACCC   | GAATGGGCAGAAGTCGTGGTGTTCAG    |
| 47   | ACLY   | ATPCL, CLATP                 | ATP citrate lyase                                                                               | NM_001096            | TGGGTCTTTACTCGGGAGG     | CACGGATGACGATACAGCCC   | TCAATGGCATCTTTGTGCTGGGAAGGA   |
| 8309 | ACOX2  | BRCOX, BRCACOX               | acyl-Coenzyme A oxidase 2, branched chain                                                       | NM_003500            | GCCCTTGGCTGTTATGATGG    | TTCTCATAGGCAGGGTTCTCC  | ACGTCTACGAACGCCTGTTCCAGTGGG   |
| 71   | ACTG1  | ACTG                         | actin, gamma 1                                                                                  | NM_001614            | TACTCGGTGTGGATCGGTGG    | CCGACTCGTCGTACTCCGTC   | GGCCTCACTGTCCACCTTCCAGCAGAT   |
| 72   | ACTG2  | ACTE, ACTA3, ACTSG           | actin, gamma 2, smooth muscle, enteric                                                          | NM_001615            | TCCTGGCCTCTCTCTCCACC    | GCACTTCTGTGGACAAATGGAG | GCAAGCCTGAGTATGATGAGGCAGGGC   |
| 102  | ADAM10 | kuz, MADM, kuzbanian         | a disintegrin and metalloproteinase domain 10                                                   | NM_001110            | AGGAGGAGACCTCCACAGCC    | GCGTCTCATGTGTCCCAATTTG | AGCGTCAGCGGCCCCGAGAGAGTTAT    |
| 4185 | ADAM11 | MDC                          | a disintegrin and metalloproteinase domain 11                                                   | NM_002390, NM_021612 | CGGCACCAACATCATCATTTG   | CGGACCTTCTCGGGCG       | CGGCACGGGCTGGGGATTTAAAAACAT   |
| 8038 | ADAM12 | MCMP, MLTN, MLTNA, MCMPMltna | a disintegrin and metalloproteinase domain 12 (meltrin alpha)                                   | NM_003474, NM_021641 | GGGTTACGAGTGTGCAATG     | GTCACAGAAGGGAGGGTCCC   | GCAACAACAGGAAGAAGCTGCCACTGCG  |
| 8751 | ADAM15 | MDC15                        | a disintegrin and metalloproteinase domain 15 (metargidin)                                      | NM_003815            | CCCAAGGAAGCCACTGCGC     | GAGCGAGGACACTGTGCGGAG  | TAGTGGTACCCTCCAGACCAGCGCCAC   |
| 6868 | ADAM17 | CSVP, TACE, CD156b           | a disintegrin and metalloproteinase domain 17 (tumor necrosis factor, alpha, converting enzyme) | NM_003183, NM_021832 | TGGACGAGGATGGGTTTGAG    | CGCTGCAGTTTAAAGGAGGC   | GCAGCACAGCTGCCAAGTCATTTGAGG   |
| 8728 | ADAM19 | MLTNB, FKSG34, MADDAM        | a disintegrin and metalloproteinase domain 19 (meltrin beta)                                    | NM_023038, NM_033274 | TTCCCAGGACTTCTCCAGGC    | GAGGCCGGGACTGCTGAG     | AGAAGGCACTCCCGGCAACCCAGT      |
| 8757 | ADAM5  | TMDCII                       | a disintegrin and metalloproteinase domain 5                                                    | AA918208             | TGAGAGAGCTATGCTATAGAGGG | TGGTGCTTTCACTGAGGATG   | TGAGAGCTCTGTGTCAGAAGAAAGCAGCA |
| 8755 | ADAM6  |                              |                                                                                                 | AI024595             | TTGCTGGCTTTGTTTGACGG    | TGTGCCTAAGAAGAGGTGCTGG | GTGTTCTTTTTGGAGGTGCCCGCTGT    |
| 8756 | ADAM7  | EAPI, GP-83                  | a disintegrin and metalloproteinase domain 7                                                    | AF090327             | AGGACTGAGCCAATCCTGCC    | GGCACTTTGATTGGGATCTGC  | AACCTGCAAGTAAAGATTCAAGAGGAA   |
| 101  | ADAM8  | MS2, CD156, CD156            | a disintegrin and metalloproteinase domain 8                                                    | NM_001109            | AGCAGGTCATCAAGCCACCG    | CAGCACCTCAGCTGGACC     | CACCCCAGTGCCCCCAGTCAAA        |
| 8754 | ADAM9  | MCMP, MDC9, MLTNG, KIAA0021  | a disintegrin and metalloproteinase domain 9 (meltrin gamma)                                    | NM_003816            | ATGCAGCCAAGCAACCTCAG    | AAAGGAGGTGCAGGAGCAGG   | AAGGCCACCTCCACCACAACCGAAAGT   |

|        |         |                                      |                                                                                                              |                      |                               |                        |                               |
|--------|---------|--------------------------------------|--------------------------------------------------------------------------------------------------------------|----------------------|-------------------------------|------------------------|-------------------------------|
| 9507   | ADAMTS4 | ADMP-1, ADAMTS-2, ADAMTS-4, KIAA0688 | a disintegrin-like and metalloprotease (reprolysin type) with thrombospondin type 1 motif, 4                 | NM_005099            | ACACACGCCTCCGATACAGC          | TCTTCGGTGCAGCCAGTCC    | CTTCAACGCCACGCCCCACTCC        |
| 11096  | ADAMTS5 | ADMP-2, ADAMTS11                     | a disintegrin-like and metalloprotease (reprolysin type) with thrombospondin type 1 motif, 5 (aggrecanase-2) | NM_007038            | GGATCACACACTTCGCA GCC         | CACTGCACCGTTCTGGTGTG   | ATGGCTCGCCTGCTCTAGGACCTGTGA   |
| 107    | ADCY1   |                                      | adenylate cyclase 1 (brain)                                                                                  | L05500               | GGAAACGGCTCCCAAATCAG          | CCCAGCCCTGACTGAGACG    | TGGGCTTGGATCGGAAATGTGTCCAT    |
| 108    | ADCY2   | HBAC2, KIAA1060                      | adenylate cyclase 2 (brain)                                                                                  | L21993               | TGGCCAGTAGGATGGACAGC          | TGCACGTGTATCCGAGGTGTC  | GGTTACCGAGGAGACGAGCCTCGTCT    |
| 109    | ADCY3   | AC3, KIAA0511                        | adenylate cyclase 3                                                                                          | NM_004036            | CTCCGAGAGTACGGCTTCCG          | AAGAAGAAGGTCAGCAGCTCCC | CTTTGTGAGGCGAGGCCCATCTTTGT    |
| 112    | ADCY6   | KIAA0422                             | adenylate cyclase 6                                                                                          | NM_015270, NM_020983 | AATCCAGGTGACCACGGACC          | CCTTGCCCTTACCTTGACC    | CAAGGGCTACCAGCTGGAGTGTGCGAGG  |
| 113    | ADCY7   | KIAA0037                             | adenylate cyclase 7                                                                                          | NM_001114            | CAGCCGAATGGAAAGCACTG          | AGCTCGCCTTTGCCTTTGAC   | ACTCTTGTGAATGCCGTGGCCTGATCA   |
| 114    | ADCY8   | ADCY3, HBAC1                         | adenylate cyclase 8 (brain)                                                                                  | NM_001115            | TCCCTCAATAGGCAAAGGCAG         | TGGGTGACAACAAAGTCGCG   | CAACAACACAGGAATCATCAAGGGTCA   |
| 115    | ADCY9   |                                      | adenylate cyclase 9                                                                                          | NM_001116            | CCTGTACCCAAAGTGCA CGG         | TTGGCAATCTCGTCTGTGGG   | ACCAGCTGTCCATCTCCCCAGACATCC   |
| 9370   | ADIPOQ  | APM1, APM-1, GBP28, ACRP30           | adipose most abundant gene transcript 1                                                                      | NM_004797            | ACCAAGTCTGGCTCCAGGTG          | GCCTGTGAAGGTGGAGTCATTG | TGGGGAAGGAGAGCGTATGGACTCTATGC |
| 176    | AGC1    | CSPG1, MSK16, CSPGCP                 | aggrecan 1 (chondroitin sulfate proteoglycan 1)                                                              | NM_001135, NM_013227 | TCCGCTGGTCAGATGGACAC          | GGGAGGTGGTAATTGCA GGG  | GGACTGTGTGGTGATGATCTGGCACGA   |
| 183    | AGT     | SERPINA8                             | angiotensinogen (serpin peptidase inhibitor, clade A, member 8)                                              | NM_000029            | GCGGATGAGAGAGAGCCAC           | AACAGGAATGGGCGGTT CAG  | AACAAGCCTGAGGTCTTGGAGGTGACC   |
| 207    | AKT1    | PKB, RAC, PRKBA, RAC-ALPHA           | v-akt murine thymoma viral oncogene homolog 1                                                                | NM_005163            | CGTCGGAGACTGACACCAGG          | GCTCGCTGTCCACACACATCC  | TTGATGAGGAGTTCAGGCCCAGATGA    |
| 208    | AKT2    | PRKBB, PKBBETA, RAC-BETA             | v-akt murine thymoma viral oncogene homolog 2                                                                | NM_001626            | CCTGCCACCCTTCAAACCTC          | CCAGCTCCAGTAAGCCCAGG   | CAATCACACCCCCTGACCGCTATGACA   |
| 249    | ALPL    | HOPS, TNSALP, AP-TNAP                | alkaline phosphatase, liver/bone/kidney                                                                      | NM_000478            | ACGTGATGGCGTATGACAGC          | TCAGAACAGGACGCTCAGGG   | CTGCTGCTCGCTCTGGCCCTCTACC     |
| 335    | APOA1   |                                      | apolipoprotein A-I                                                                                           | NM_000039            | CAGACTGGCCGAGTACCACG          | CTTGAAGCTCTCCAGCAGCGG  | GAGCATCTGAGCACGCTCAGCGAGAAG   |
| 116519 | APOA5   | RAP3, APOAV                          | apolipoprotein A-V                                                                                           | NM_052968            | TGGCAAGTTCTGAGCAAGC           | GGCCCTGGTCATGAAGGC     | CCGTCTGGATGACCTGTGGGAAGACATC  |
| 338    | APOB    | FLDB                                 | apolipoprotein B (including Ag(x) antigen)                                                                   | NM_000384            | CATTTCTGATATACATCACGGAGTTACTG | TGGAGCAAGCTTCATGTAGGG  | AAAGCTGCAATCAACCA CAGTCATGAA  |

|       |         |                                   |                                                                                                            |                         |                            |                            |                                      |
|-------|---------|-----------------------------------|------------------------------------------------------------------------------------------------------------|-------------------------|----------------------------|----------------------------|--------------------------------------|
| 344   | APOC2   |                                   | apolipoprotein C-II                                                                                        | NM_000483               | ATGAGATGCCTAGCCCG<br>ACC   | TCTCGTACAGGTTCTGG<br>GCG   | CCTCACCCAGGTGAAGG<br>AATCTCTCTCCA    |
| 345   | APOC3   |                                   | apolipoprotein C-III                                                                                       | NM_000040               | GACCGATGGCTTCAGTT<br>CCC   | CCACGGCTGAAGTTGGT<br>CTG   | TCTGAGTTCTGGGATTTG<br>GACCCTGAGG     |
| 346   | APOC4   |                                   | apolipoprotein C-IV                                                                                        | NM_001646               | ACAGGACCAGAGACGG<br>GTGG   | AGGTCCCTCAGGTGGTC<br>GTC   | CCTTCCGGGGCTTCATG<br>CAGACCTACT      |
| 347   | APOD    |                                   | apolipoprotein D                                                                                           | NM_001647               | TGGCAAGAAACCCTAAT<br>CTCCC | GGCAGTTCACCTGGTCT<br>GTG   | TAACATTGATGTCAAGAA<br>AATGACGGT      |
| 348   | APOE    |                                   | apolipoprotein E                                                                                           | NM_000041               | GGAGCAGGCCAGCAG<br>ATAC    | CTGCATGTCTTCCACCA<br>GGG   | CAGGCCCGCCTCAAGAG<br>CTGGTTC         |
| 319   | APOF    |                                   | apolipoprotein F                                                                                           | NM_001638               | GGGTTTGAGGGCCATCT<br>CAG   | CCCAGTAGGGAGCTGAA<br>CTTAC | TGTGAGTGACTTGGAAG<br>AAACAACACTCTGGC |
| 387   | ARHA    | ARH12, RHOH12                     | ras homolog gene family,<br>member A                                                                       | NM_001664               | TATGGCAAACAGGATTG<br>GCG   | TCTTCCCACGTCTAGCTT<br>GCAG | TGGGTACATGGAGTGT<br>CAGCAAAGACCA     |
| 388   | ARHB    | ARH6, RHOH6                       | ras homolog gene family,<br>member B                                                                       | NM_004040               | TCGAGTGCTCTGCCAAG<br>ACC   | AGCAGTTGATGCAGCCG<br>TTC   | AAGGAAGGCGTGCGCG<br>AGGTCTTC         |
| 468   | ATF4    | CREB2, TXREB,<br>CREB-2, TAXREB67 | activating transcription factor<br>4 (tax-responsive enhancer<br>element B67)                              | NM_001675               | TGGCATCTGTATGAGCC<br>CAG   | GTAAGGTTTGGGACGGG<br>CAG   | GGGTCTCCTCAGCACAG<br>CCCCTCTACC      |
| 22926 | ATF6    |                                   | activating transcription factor<br>6                                                                       | NM_007348               | TCGGTTCCTCCTTACCTC<br>CG   | CTGACAACGTGGGTTGC<br>CTC   | ACCAACACCTTCTTTGG<br>CTCCCCTCCC      |
| 487   | ATP2A1  | ATP2A, SERCA1                     | ATPase, Ca <sup>++</sup> transporting,<br>cardiac muscle, fast twitch 1                                    | NM_004320               | CCCTGGACCTCACCCAG<br>TG    | TCCGAGCAACGAACTTG<br>AGG   | GATCTCACTGCCAGTCA<br>TTGGGCTCGA      |
| 551   | AVP     | VP, ADH, ARVP,<br>AVRP, AVP-NPII  | arginine vasopressin<br>(neurophysin II, antidiuretic<br>hormone, diabetes insipidus,<br>neurohypophyseal) | NM_000490               | CGTTTGCTGCAACGACG<br>AG    | GTGGCGTTGCTCCGGTC          | CGAGTGCCGCGAGGGC<br>TTTCAC           |
| 23621 | BACE    | BACE1                             | beta-site APP-cleaving<br>enzyme                                                                           | NM_012104               | TCAACCCTCATGACCATA<br>GCC  | CGCCACTGACACACCAT<br>GAG   | ATCTGCGCCCTCTTCAT<br>GCTGCCAC        |
| 572   | BAD     | BCL2L8                            | BCL2-antagonist of cell death                                                                              | NM_004322,<br>NM_032989 | AAGAAGGGACTTCCTCG<br>CCC   | AGTCCGATCCCACCAG<br>GAC    | CAAAGCTCCAGCTGGAC<br>GCGAGTCTTC      |
| 578   | BAK1    | CDN1, BCL2L7                      | BCL2-antagonist/killer 1                                                                                   | NM_001188               | CTGGCTTCTAGGCCAG<br>GTG    | CAGCACGTTCAGGATGG<br>GAC   | CGACTTCATGCTGCATC<br>ACTGCATTGC      |
| 581   | BAX     |                                   | BCL2-associated X protein                                                                                  | NM_004324               | GGGTGGTTGGGTGAGAC<br>TCC   | GCACCACTGTGACCTGC<br>TCC   | CACTCCTCTGGGACCCT<br>GGGCCTTCT       |
| 596   | BCL2    |                                   | B-cell CLL/lymphoma 2                                                                                      | NM_000633,<br>NM_000657 | GAGGAGCTCTTCAGGGA<br>CGG   | ACTCAGTCATCCACAGG<br>GCG   | GTTTCGGTGGGGTCATGT<br>GTGTGGAGAG     |
| 598   | BCL2L1  | BCLX, BCL2L                       | BCL2-like 1                                                                                                | NM_001191               | ATCCCAGCTCCACATCA<br>CCC   | TCTCGGCTGCTGCATTG<br>TTC   | CAGGGACAGCATATCAG<br>AGCTTTGAACAGGA  |
| 10018 | BCL2L11 | BIM, BOD, BIML,<br>BIMEL          | BCL2-like 11 (apoptosis<br>facilitator)                                                                    | NM_006538               | GCCAGAGATATGGATC<br>GCC    | GGTGGTCTTCGGCTGCT<br>TG    | TGCGGCGTATCGGAGAC<br>GAGTTTAACG      |



|     |        |                                          |                                                                        |                                                                  |                         |                        |                                  |
|-----|--------|------------------------------------------|------------------------------------------------------------------------|------------------------------------------------------------------|-------------------------|------------------------|----------------------------------|
| 599 | BCL2L2 | BCLW, BCL-W, KIAA0271                    | BCL2-like 2                                                            | NM_004050                                                        | TGGGCGGAGTTCACAGC TC    | CTCACTGATGCCAGTT CCC   | TATACGGGGACGGGGC CCTGGAG         |
| 627 | BDNF   |                                          | brain-derived neurotrophic factor                                      | NM_001709                                                        | ATTGGAACTCCAGTGC CG     | TGAATCGCCAGCCAATT CTC  | GCGGGCCCTTACCATGG ATAGCAAAAA     |
| 632 | BGLAP  | BGP                                      | bone gamma-carboxyglutamate (gla) protein (osteocalcin)                | NM_000711                                                        | AGGAGGGCAGCGAGGT AGTG   | CCGATGTGGTCAGCCAA CTC  | CAGGCGCTACCTGTATC AATGGCTGGG     |
| 637 | BID    |                                          | BH3 interacting domain death agonist                                   | NM_001196                                                        | GCTGCAGGCCTACCCTA GAGAC | GACATCACGGAGCAAGG ACG  | GAAGGAGAAGACCATGC TGGTGCTGGC     |
| 638 | BIK    | BP4, NBK, BIP1                           | BCL2-interacting killer (apoptosis-inducing)                           | NM_001197                                                        | TTTCATGGACGGTTTCAC CAC  | CTGTTCGCAGGACACCC AG   | ATGAGGTTCTGGAGATC CCCGAACCCC     |
| 331 | BIRC4  | API3, ILP1, MIHA, XIAP, hILP, ILP-1      | baculoviral IAP repeat-containing 4                                    | NM_001167                                                        | CTAAGGCGCCTGCAAGA GG    | GCACATGGGACACTTGT CAAC | TGCTATCGTTTTTGTTC TTTGTGGACA     |
| 332 | BIRC5  | API4                                     | baculoviral IAP repeat-containing 5 (survivin)                         | NM_001168                                                        | CTGACAGCTTTGTTCGC GTG   | CAACAGGCACCTGCCAA GTC  | TGGACCTCATGTTGTTG AGGCTGTCACA    |
| 649 | BMP1   |                                          | bone morphogenetic protein 1                                           | NM_001199, NM_006128, NM_006129, NM_006130, NM_006131, NM_006132 | GAGGTGCGCAGTGGACT CAC   | CGCGCATGTTGTTGTAC TGG  | CTCCAAGCTGCATGGCA AGTTCTGTGG     |
| 650 | BMP2   | BMP2A                                    | bone morphogenetic protein 2                                           | NM_001200                                                        | CTAAGGCATGCTGTGTG CCG   | CCCTCCACAACCATGTG C TG | TGCTATCTCGATGCTGTA CCTTGACGA     |
| 651 | BMP3   |                                          | bone morphogenetic protein 3 (osteogenic)                              | NM_001201                                                        | CGTTCCTGGGATTCCTG AGC   | TGCAAGCGCAAGACTCT ACTG | TGCTGTGTACCAGAAAA GATGTCCTCACTCA |
| 652 | BMP4   | ZYME, BMP2B, BMP2B1                      | bone morphogenetic protein 4                                           | NM_001202                                                        | AACCAACCATGCCATTG TGC   | TGGCACTCAGTTCAGTG GGC  | TGTCAATTCCAGTATCCC CAAAGCCTG     |
| 653 | BMP5   |                                          | bone morphogenetic protein 5                                           | NM_021073                                                        | AACGCCCATATGAATGC CAC   | TGGTTGGAGCACAACAA GGC  | TGGTTCATCTGATGTTTC CTGACCACG     |
| 654 | BMP6   | VGR1                                     | bone morphogenetic protein 6                                           | NM_001718                                                        | ATGAATGCAACCAACCA CGC   | GCTTAGTTGGCGCACAG CAC  | GCAGACCTTGGTTCACC TTATGAACCCCG   |
| 655 | BMP7   | OP-1                                     | bone morphogenetic protein 7 (osteogenic protein 1)                    | NM_001719                                                        | ACATGAACGCCACCAAC CAC   | ACGGAGATGGCATTGAG CTG  | ATCGTGCAGACGCTGGT CCACTTCATC     |
| 657 | BMPR1A | ALK3, ACVRLK3                            | bone morphogenetic protein receptor, type IA                           | NM_004329                                                        | CGGCCAATTGTGTCTAA TCGG  | CCATCTTGGCAAGCGTC TTC  | AATGTCAGAATGCTGGG CCCACAATCC     |
| 658 | BMPR1B | ALK6, ALK-6                              | bone morphogenetic protein receptor, type IB                           | NM_001203                                                        | ACCGGTGGAGCAGTGAT GAG   | TCTTAACCCGCAGGGCT GTC  | ACAGAATGCTGGGCTCA CAATCCTGCA     |
| 659 | BMPR2  | BMR2, PPH1, BMPR3, BRK-3, T-ALK, BMPR-II | bone morphogenetic protein receptor, type II (serine/threonine kinase) | NM_001204, NM_033346                                             | TCCACCTGGGTCATCTC CAC   | GCAGTGCCTCCTTCTGC AAG  | GGCAGTTCATTCCAAAT CCAGCACTGC     |
| 666 | BOK    | BOKL, BCL2L9, MGC4631                    | BCL2-related ovarian killer                                            | NM_032515                                                        | GTGGTCAGCACAGACCC TGG   | ATCTCTCTGGCAGCAGC ACG  | GCTGGTGGCTGCACTCT GCAGCTTC       |
| 718 | C3     |                                          | complement component 3                                                 | NM_000064                                                        | TCATCGGGAAGGACACT TGG   | ACCATGCTCTCGGTGAA GGC  | CCTGAGGAGGACGAATG CCAAGACGAA     |

|       |         |                                        |                                                                                  |                                                                                        |                         |                          |                                   |
|-------|---------|----------------------------------------|----------------------------------------------------------------------------------|----------------------------------------------------------------------------------------|-------------------------|--------------------------|-----------------------------------|
| 779   | CACNA1S | MHS5, HOKPP, hypoPP, CCHL1A3, CACNL1A3 | calcium channel, voltage-dependent, L type, alpha 1S subunit                     | NM_000069                                                                              | GATGCCTGCCAAATGGA ACC   | GGAGGACCCGAGGTTCA GG     | TACTGAAAGGACGAGAG GCCCCAGACG      |
| 800   | CALD1   | CDM, NAG22                             | caldesmon 1                                                                      | NM_004342, NM_033138, NM_033139, NM_033140, NM_033157                                  | TCTAGCCGCATCAATGA ATGG  | TTCCGCTTGCTGGATAC GTC    | CCAGATGGAAACAAGTC ACCTGCTCCCA     |
| 11132 | CAPN10  |                                        | calpain 10                                                                       | NM_021251, NM_023083, NM_023084, NM_023085, NM_023086, NM_023087, NM_023088, NM_023089 | ACCGGCTGCAGATGGGAG      | CAAGTCGCAGAAGAGCG AGG    | CTGTTCCGGGACGCCGC CTTC            |
| 834   | CASP1   | ICE, P45, IL1BC                        | caspase 1, apoptosis-related cysteine protease (interleukin 1, beta, convertase) | NM_001223, NM_033292, NM_033293, NM_033294, NM_033295                                  | TGCCTGTTCTGTGATGT GG    | GGCATCTGCGCTCTACC ATC    | TCCGCAAGGTTTCGATTTT CATTGAGCA     |
| 844   | CASQ1   | CASQ                                   | calsequestrin 1 (fast-twitch, skeletal muscle)                                   | NM_001231                                                                              | TTGACATCGACTTGTCAGCCC   | AAGGCAGGTCCTCCTCA TCG    | TGCGGATAGGCTATGGA TGGAATGGA       |
| 845   | CASQ2   |                                        | calsequestrin 2 (cardiac muscle)                                                 | NM_001232                                                                              | ATGTCACAGATGCTGAC AGTG  | TCCAGTCCTCCAGCTCC TCAG   | TCTGGATGGAGATTCCA GATGATGACGA     |
| 847   | CAT     |                                        | catalase                                                                         | NM_001752                                                                              | ACCCTGACTACGGGAGCAC     | ATCCGGACTGCACAAAG GTG    | TGCTGAGAAGCCTAAGA ATGCGATTCA      |
| 891   | CCNB1   | CCNB                                   | cyclin B1                                                                        | NM_031966                                                                              | CCAGTTATGCAGCACCT GGC   | TTAGCATGCTTCGATGT GGC    | TCAAGGACTTACAAAGC ACATGACTGTCA    |
| 595   | CCND1   | BCL1, PRAD1, U21B31, D11S287E          | cyclin D1 (PRAD1: parathyroid adenomatosis 1)                                    | NM_053056                                                                              | GTGTGACCCAGACTGCC TCC   | GGTCCATGTTCTGCTGG GC     | CAGATCGAAGCCCTGCT GGAGTCAAGC      |
| 948   | CD36    |                                        | CD36 antigen (collagen type I receptor, thrombospondin receptor)                 | NM_000072                                                                              | GACTGGGACCATTGGTG ATGAG | TCATTTCTATCAGGCCAA GGAGG | GGCAAACATGTTTCAGAA GTCAAGTAACTGGA |
| 949   | CD36L1  | CLA1, SRB1, CLA-1, SR-BI               | CD36 antigen (collagen type I receptor, thrombospondin receptor)-like 1          | NM_005505                                                                              | TCCGGAGCCAAGAGAAA TGC   | AGAGCCCTTGGGAGCTG ATG    | TCAAAGGATAAAGGAGGC CATTGAGGCC     |
| 920   | CD4     |                                        | CD4 antigen (p55)                                                                | NM_000616                                                                              | CAATGGCCCTGATTGTG CTG   | GAGACATCCGCTCTGCT TGG    | GCCTCCTGCTTTTCATTG GGCTAGGCA      |
| 960   | CD44    | IN, MC56, MDU2, MDU3, MIC4, CD44R      | CD44 antigen (homing function and Indian blood group system)                     | NM_000610                                                                              | AACGGAGAGGCCAGCAAGTC    | TGTCCACATTCTGCAGG TTCC   | GGTGCATTTGGTGAACA AGGAGTCGTCA     |

|       |         |                                            |                                                                                                    |                      |                          |                        |                               |
|-------|---------|--------------------------------------------|----------------------------------------------------------------------------------------------------|----------------------|--------------------------|------------------------|-------------------------------|
| 941   | CD80    | LAB7, CD28LG, CD28LG1                      | CD80 antigen (CD28 antigen ligand 1, B7-1 antigen)                                                 | NM_005191            | CTCCCATCCTGGGCCAT TAC    | CAGGGCGTACACTTTCC CTTC | CTGCCTGACCTACTGCT TTGCCCAAG   |
| 942   | CD86    | B70, B7-2, LAB72, CD28LG2                  | CD86 antigen (CD28 antigen ligand 2, B7-2 antigen)                                                 | NM_006889            | GGAAATGGAAGAAGAAG AAGCG  | AACACGCTGGGCTTCAT CAG  | GCCTCGCAACTCTTATAA ATGTGGAAC  |
| 925   | CD8A    | CD8                                        | CD8 antigen, alpha polypeptide (p32)                                                               | NM_001768            | CCACAGGAACCGAAGAC GTG    | GACGTATCTCGCCGAAA GGC  | CTGTGGTCAAATCGGGA GACAAGCCCA  |
| 983   | CDC2    | CDK1                                       | cell division cycle 2, G1 to S and G2 to M                                                         | NM_001786, NM_033379 | TCCCAAATGGAACCGAG GAAG   | TTGCCAGAAATTCGTTTGC    | TGGATGAAAATGGCTTG GATTGCTCTCG |
| 1019  | CDK4    | CMM3, PSK-J3, MGC14458                     | cyclin-dependent kinase 4                                                                          | NM_000075, NM_052984 | CCTGAGATGGAGGAGTC GGG    | GTGCTGCAGAGCTCGAA AGG  | GCACAGCTGCTGCTGGA AATGCTGACT  |
| 1021  | CDK6    | PLSTIRE                                    | cyclin-dependent kinase 6                                                                          | NM_001259            | CAGTGCCCTGTCTCACC CATAAC | GGCTGTATTCAGCTCCG AGG  | AAAGAAAACCTGGATTC CCACCTGCCG  |
| 1026  | CDKN1A  | P21, CIP1, SDI1, WAF1, CAP20, CDKN1, MDA-6 | cyclin-dependent kinase inhibitor 1A (p21, Cip1)                                                   | NM_000389, NM_078467 | TACCCTTGTGCCTCGCT CAG    | AGAAGATCAGCCGGCGT TTG  | TCCCAGGTGACCTGGG AGACTCTCAG   |
| 1027  | CDKN1B  | KIP1, CDKN4, P27KIP1                       | cyclin-dependent kinase inhibitor 1B (p27, Kip1)                                                   | NM_004064            | GGAGCAATGCGCAGGAA TAAG   | CTCCACAGAACCGGCAT TTG  | GAAGCGACCTGCAACCG ACGATTCTTC  |
| 1056  | CEL     | BAL, BSSL                                  | carboxyl ester lipase (bile salt-stimulated lipase)                                                | NM_001807            | CACGGGTGACTCCGAGAC C     | GACTGCAGGCATCTGAG CTTC | GGGTGACTCTGAGGCTG CCCCTGTG    |
| 10390 | CEPT1   | DKFZp313G0615, MGC45223                    | choline/ethanolaminephosphotransferase                                                             | NM_006090            | TTGTACTTTGGATTGCC TGG    | TGCAGGTGAGACGCAAT CTG  | TGATCCGCTACTGTGTC AGTGTTTGCA  |
| 23491 | CES3    | BR3                                        | carboxylesterase 3 (brain)                                                                         | NM_012122            | CAGCCCAGAGGCTGAAG GAC    | ACATGTTCCCTGTGGGA TGG  | AGTTTTTGGGCTGAGCT CAGGGCCAAG  |
| 1071  | CETP    |                                            | cholesteryl ester transfer protein, plasma                                                         | NM_000078            | CCTCATGAACAGCAAAG GCG    | ATCCACCAGCAGGTGCT CAG  | ATGGCTTCTGCTGCTG CAGATGGACT   |
| 1080  | CFTR    | CF, MRP7, ABC35, ABCC7                     | cystic fibrosis transmembrane conductance regulator, ATP-binding cassette (sub-family C, member 7) | NM_000492            | TGCGGCAGTACGATTCC ATC    | GAGCTTACCCTGTCCG AGG   | ACTGCTGAACGAGAGGA GCCTTTCCG   |
| 1154  | CISH    | CIS, G18                                   | cytokine inducible SH2-containing protein                                                          | NM_013324            | CTGGTGCAGCCCTTTGT ACG    | GGTACTGTCCGAGGTA GTCCG | CAACACCTGTGCCGCCT TGTCATCAAC  |
| 1300  | COL10A1 |                                            | collagen, type X, alpha 1(Schmid metaphyseal chondrodysplasia)                                     | NM_000493            | ATCAGGCTTCAGGGAGT GCC    | ATTTGACTCGGCATTGG GAAG | TCACAGAAAATGACCAG GTGTGGCTCCA |
| 1278  | COL1A2  | OI4                                        | collagen, type I, alpha 2                                                                          | NM_000089            | GAGGGCAACAGCAGGTT CAC    | AGCACCACCGATGTCCA AAG  | TTACACTGTTCTTGTAGA TGGCTGCTC  |
| 1280  | COL2A1  | SEDC, COL11A3                              | collagen, type II, alpha 1 (primary osteoarthritis, spondyloepiphyseal dysplasia, congenital)      | NM_001844, NM_033150 | CAGAAGACCTCACGCCT CCC    | AGAAGCAGACCGGCCCT ATG  | ACATTGCACCCATGGAC ATAGGAGGGC  |

|       |         |                                           |                                                                                              |                      |                        |                           |                                   |
|-------|---------|-------------------------------------------|----------------------------------------------------------------------------------------------|----------------------|------------------------|---------------------------|-----------------------------------|
| 1311  | COMP    | MED, EDM1, EPD1, PSACH                    | cartilage oligomeric matrix protein (pseudoachondroplasia, epiphyseal dysplasia 1, multiple) | NM_000095            | GGGTGCGATTCTATGAG GGC  | TGCCCCAGATGATGTTCC        | GCAACGTGGTCTTGAC ACAACCATGC       |
| 1312  | COMT    |                                           | catechol-O-methyltransferase                                                                 | NM_000754, NM_007310 | GGTGCGCCAGACTTCTT AGC  | TCCACCACCTCCCTGTA TTCC    | GGGAGCAGCTGCTTTGA GTGCACACAC      |
| 10814 | CPLX2   | CPX2, 921-L                               | complexin 2                                                                                  | NM_006650            | CTGACCCG GCCCAAGAA G   | GCCCGGGCAGGTATTTG AG      | AGCATCCTGGACACGGT G               |
| 1374  | CPT1A   | CPT1, CPT1-L, L-CPT1                      | carnitine palmitoyltransferase I, liver                                                      | NM_001876            | TGCTGATGACGGCTATG GTG  | TCCAAAGCGATGAGAAT CCG     | TGTGGGAGAGAACCTCA TCAATTTCCACA    |
| 1375  | CPT1B   | CPT1-M, M-CPT1, KIAA1670                  | carnitine palmitoyltransferase I, muscle                                                     | NM_004377            | AGGTGGCTTTGGCCCTG TAG  | TGCGGATGTGTTTCCA AAG      | TGCAGGCGAGAACACGA TCTTCTTCCA      |
| 1376  | CPT2    | CPT1, CPTASE                              | carnitine palmitoyltransferase II                                                            | NM_000098            | CAGCCCAGCAGTGAACC TTG  | CGGCCTGGGTAGGAAGA GAC     | TTTGCCCTGTGGTCTCT GATGGCTTT       |
| 1385  | CREB1   |                                           | cAMP responsive element binding protein 1                                                    | NM_004379            | GGGAAGCAGCTCGAGA GTGTC | TCTGATTTGTGGCAGTAA AGGTCC | TGGCAGTGCTTGAAAAT CAAAACAAGACA    |
| 1390  | CREM    |                                           | cAMP responsive element modulator                                                            | NM_001881            | TGGCAGAAGAAGCAACA CGC  | TCTTCTTCTGCGACACT CCC     | GCTGAGGCTAATGAAAA ACAGAGAAGCTGCCC |
| 1401  | CRP     | PTX1                                      | C-reactive protein, pentraxin-related                                                        | NM_000567            | CCCTGGTGGGAGACATT GG   | TGGTGAACACTTCGCCT TGC     | ATGTCCTGAAGTGGCGG GCACTGAAGT      |
| 1431  | CS      |                                           | citrate synthase                                                                             | NM_004077            | CGAGCATTGGGTGTACT GGC  | TCAGACCCTCTGTGCTC ATGG    | CTGGAGCCGAGCCTTAG GCTTCCCTCT      |
| 1437  | CSF2    | GMCSF, GM-CSF                             | colony stimulating factor 2 (granulocyte-macrophage)                                         | NM_000758            | TACAAGCAGCACTGCCC TCC  | GGCTCCCAGCAGTCAAA GG      | CCGAAACTTCTGTGCA AACCAGACT        |
| 1445  | CSK     |                                           | c-src tyrosine kinase                                                                        | NM_004383            | CTCGGGTGGAGAAGGG CTAC  | CGGAGCTGTAGGAAGGA GGG     | TCATGAAGAACTGCTGG CACCTGGACG      |
| 1499  | CTNNB1  | CTNNB                                     | catenin (cadherin-associated protein), beta 1 (88kD)                                         | NM_001904            | TGGAACATGAGATGGGT GGC  | CAAACCAGGCCAGCTGA TTG     | ATCCAGTTGATGGGCTG CCAGATCTGG      |
| 1513  | CTSK    | CTSO, PKND, PYCD, CTSO2, CTSO1, CTSO2     | cathepsin K (pseudodysostosis)                                                               | NM_000396            | GCGATAATCTGAACCAT GCGG | CAATGCCACAGGCGTTG TTC     | CAGCTGGGGAGAAAAC TGGGAAACAA       |
| 1585  | CYP11B2 | CPN2, CYP11B, CYP11BL, P-450C18, P450aldo | cytochrome P450, subfamily X1B (steroid 11-beta-hydroxylase), polypeptide 2                  | NM_000498            | CGTGCTGAAGCACTTCC TGG  | ACGTGCCAGGCCTCAAT ATG     | TCAAGAGGACATAAAGA TGGTCTACAGC     |
| 1555  | CYP2B6  | CPB6, IIB1, P450, CYP11B6                 | cytochrome P450, subfamily IIB (phenobarbital-inducible), polypeptide 6                      | NM_000767            | TGTCTTGGTGAAGGCAT CGC  | TGCCACACCACACTCC TG       | GCCCCAGAAGACATCGA TCTGACACCC      |
| 1559  | CYP2C9  | CPC9, CYP2C10, P450IIC9, P450, P450       | cytochrome P450, subfamily IIC (mephenytoin 4-hydroxylase), polypeptide 9                    | NM_000771            | TTTGTGTGGGAGAAGCC CTG  | GTAGAAGGGCGGCACA GAGG     | GCCGGCATGGAGCTGTT TTTATTCTGA      |

|      |         |                                     |                                                                                    |           |                              |                               |                                     |
|------|---------|-------------------------------------|------------------------------------------------------------------------------------|-----------|------------------------------|-------------------------------|-------------------------------------|
| 1576 | CYP3A4  | CP34, NF-25, P450C3, P450PCN1       | cytochrome P450, subfamily IIIA (niphedipine oxidase), polypeptide 4               | NM_017460 | GACCCAGAAACTGCATT<br>GGC     | TCTGGTTGAAGAAGTCC<br>TCCTAAGC | TGAGGTTTGCTCTCATG<br>AACATGAAACTTGC |
| 1579 | CYP4A11 | CP4Y, CYP4A2, CYP4AII               | cytochrome P450, subfamily IVA, polypeptide 11                                     | NM_000778 | TGCATCGGGAAACAATT<br>TGC     | ATCAGGCAGCAGCTCAA<br>AGC      | CATGAACGAGCTGAAGG<br>TGGCCACG       |
| 1580 | CYP4B1  | P-450HP                             | cytochrome P450, subfamily IVB, polypeptide 1                                      | NM_000779 | TCACAGCCATGTGCTTG<br>CTC     | TGAAAGCCATTCTTGG<br>GCG       | TTGAGTTCTCTCTGGAC<br>CCCTCACGGC     |
| 1595 | CYP51   | LDM, CP51, CYPL1, P450L1, P450-14DM | cytochrome P450, 51 (lanosterol 14-alpha-demethylase)                              | NM_000786 | GACAATTTGGTCCACTAT<br>GCTTCG | CGGATAACTGGGTTCTC<br>AGGG     | TCATTGATGGATACTTTC<br>CCACTGTGA     |
| 1581 | CYP7A1  | CP7A, CYP7                          | cytochrome P450, subfamily VIIA (cholesterol 7 alpha-monooxygenase), polypeptide 1 | NM_000780 | TTCGCTATCCACGAAATC<br>AAGC   | CGGGACTGGTCCAAAGG<br>TG       | TGAATTGGAGCTTATAGA<br>GGGCCAAGC     |
| 1582 | CYP8B1  | CP8B, CYP12                         | cytochrome P450, subfamily VIIB (sterol 12-alpha-hydroxylase), polypeptide 1       | NM_004391 | GGTGGACCCTGACACAC<br>CAC     | TGTAGGATGCAGGCGGT<br>AGC      | ACCATGCAGCCCAGCCA<br>CGATGT         |
| 1634 | DCN     | PG40, PGII, PGS2, DSPG2             | decorin                                                                            | NM_001920 | TCTGCCACCTGGACAC<br>AAC      | ATGGCAGAGCGCACGTA<br>GAC      | TTCAGCAACCCGGTCCA<br>GTACTGGGAG     |
| 1649 | DDIT3   | CHOP, CHOP10, GADD153               | DNA-damage-inducible transcript 3                                                  | NM_004083 | CTGGAAAGCAGCGCATG<br>AAG     | GCGAGTCGCCTCTACTT<br>CCC      | ATGAACGGCTCAAGCAG<br>GAAATCGAGC     |
| 1666 | DECR1   | DECR, NADPH                         | 2,4-dienoyl CoA reductase 1, mitochondrial                                         | NM_001359 | CGCAAATCTTGCTGCTTT<br>CC     | TCCCCTGCTCCTTGGT<br>GAC       | TTCAGGGGAATTCAACG<br>ACCTGAGAAA     |
| 1675 | DF      |                                     | D component of complement (adipsin)                                                | NM_001928 | ATGTGCGCGGAGAGCAA<br>TC      | GTAGATCCCGGGCTTCT<br>TGC      | GACAGCTGCAAGGGTGA<br>CTCCGGG        |
| 8694 | DGAT1   | DGAT, ARGP1                         | diacylglycerol O-acyltransferase homolog 1 (mouse)                                 | NM_012079 | AGATCCCCTGGCCTGG<br>TTC      | TGGACGTACATGAGGAC<br>GGC      | ACTATGGCAACGCAGCT<br>GTGTGGCTGT     |
| 1760 | DMPK    | DM, DM1, DMK                        | dystrophia myotonica-protein kinase                                                | NM_004409 | GCTTCCCTGCTCCTGTT<br>CG      | GCCAGACTGCGGTGAGT<br>TG       | GTTGTTCTGTCTCGTGC<br>CGCCGC         |
| 1869 | E2F1    | RBP3, E2F-1, RBBP3                  | E2F transcription factor 1                                                         | NM_005225 | AGCATGTGCGGGAGGAC<br>TTC     | GCCGAAGTGGTAGTCGA<br>GGG      | GCCTCCTCCCTGAGGAG<br>TTCATCAGCC     |
| 1892 | ECHS1   | SCEH                                | enoyl Coenzyme A hydratase, short chain, 1, mitochondrial                          | NM_004092 | AGCGATGGCCAAAGAAT<br>CAG     | TTTCCACAAACGCGGTC<br>ATC      | TCAACCTTTGCCACTGAT<br>GACCCGAAA     |
| 1906 | EDN1    | ET1                                 | endothelin 1                                                                       | NM_001955 | AACCAGGTCGAGACCA<br>TGAG     | ACCAATGTGCTCGGTTG<br>TGG      | TCATGATCCCAAGCTGA<br>AAGGCAAGCC     |
| 1909 | EDNRA   |                                     | endothelin receptor type A                                                         | NM_001957 | TTTCCAGTCATGCCTCTG<br>CTG    | TCCACTGGATGCTTGT<br>CCG       | CCAAAAGTCTGATGACC<br>TCGGTCCCA      |

|       |         |                               |                                                                                                                |           |                         |                         |                               |
|-------|---------|-------------------------------|----------------------------------------------------------------------------------------------------------------|-----------|-------------------------|-------------------------|-------------------------------|
| 1956  | EGFR    | ERBB                          | epidermal growth factor receptor (erythroblastic leukemia viral (v-erb-b) oncogene homolog, avian)             | NM_005228 | AACAGCACATTCGACAGCCC    | ATTTGGCTTGGCTTCCTTGG    | GCCTGGACAACCCTGACTACCAGCAGG   |
| 1958  | EGR1    | TIS8, NGFI-A, KROX24, ZIF-268 | early growth response 1                                                                                        | NM_001964 | GCTCCTCGACCTACCCATCC    | AAGGGAAGCTGCTGACCTGG    | GCCACCACGTACTCCTCTGTTCCCCCT   |
| 1959  | EGR2    | KROX20                        | early growth response 2 (Krox-20 homolog, Drosophila)                                                          | NM_000399 | CGCCACACCAAGATCCACC     | CCGCCAAGACTGCTGCTG      | ACAGAAAGAGCGGAAAA GCAGTGCCCC  |
| 1960  | EGR3    |                               | early growth response 3                                                                                        | NM_004430 | ACTCATACGGGCGAGAA GCC   | CTTGGCGTGGCGCTTG        | GCGAGTTCTGCGGGCGC AAGTTT      |
| 1961  | EGR4    | NGFIC, NGFI-C, PAT133         | early growth response 4                                                                                        | NM_001965 | AGAAACGGCACAGCAAG GTG   | GAGAAGCGAAGGAGAG GCCC   | GCTCAAGGGCCTCGGCT TTTACTCGCT  |
| 1962  | EHHADH  | PBFE                          | enoyl-Coenzyme A, hydratase/3-hydroxyacyl Coenzyme A dehydrogenase                                             | NM_001966 | TGCTTCCACAGTTGGGT TGC   | GGGTTTCCCTGAGAAGC CAG   | GAACCCTGATATTCCCC AACTGGAGCCA |
| 9451  | EIF2AK3 | PEK, WRS, PERK                | eukaryotic translation initiation factor 2-alpha kinase 3                                                      | NM_004836 | CAGTGCTCAGACAGAGG TCTCG | TTGGCAAAGGGCTATGG GAG   | TCGGGAACAAAACATTC AAGACAGTCCA |
| 2002  | ELK1    |                               | ELK1, member of ETS oncogene family                                                                            | NM_005229 | CGCTGCCTCCTAGCATT CAC   | TGCCACTGGATGGA AAC TGG  | TTCTGGAGCACCCCTGAG TCCCATTGC  |
| 2022  | ENG     | END, ORW, HHT1, ORW1, CD105   | endoglin (Osler-Rendu-Weber syndrome 1)                                                                        | NM_000118 | CGCTTGAACATCATCAG CCC   | GAGTGCAGCAGTGAGCA GGG   | ACCTGTCTGGTTGCACA AGCAAAGGCC  |
| 2064  | ERBB2   | NEU, NGL, HER2, HER-2         | v-erb-b2 erythroblastic leukemia viral oncogene homolog 2, neuro/glioblastoma derived oncogene homolog (avian) | NM_004448 | AGCCCAGCCTTCGACAA CC    | GTCCCTTTGAAGGTGCT GGG   | ATTACTGGGACCAGGAC CCACCAGAGC  |
| 2081  | ERN1    | IRE1, IRE1P                   | ER to nucleus signalling 1                                                                                     | NM_001433 | CTCCTCGCACACACCTA CCG   | GAGGGCGTCTGGAGTCA CTG   | TACTACTTCCACGAGCC CCCAGAGCCC  |
| 10595 | ERN2    | IRE1b                         | ER to nucleus signalling 2                                                                                     | NM_033266 | AGTTGAGGTGCGACAGG CAC   | GGGCAGGAAGAGGCTCT CAG   | CTCCACACGCACCGAGT CATGAGGAGT  |
| 2149  | F2R     | TR, CF2R, PAR1                | coagulation factor II (thrombin) receptor                                                                      | NM_001992 | ACGCTTCCTCTGAGTGC CAG   | TTTACTTGCCATCAACTG CCC  | GCTGCAAAGAAAGTTCC GATCCAGCA   |
| 2150  | F2RL1   | PAR2, GPR11                   | coagulation factor II (thrombin) receptor-like 1                                                               | NM_005242 | CCCTTAACAGCTGCATC GACC  | TACAGTGCGGACACTTC GGC   | TCAGGGATCATGCAAAG AACGCTCTCC  |
| 2152  | F3      | TF, TFA, CD142                | coagulation factor III (thromboplastin, tissue factor)                                                         | NM_001993 | CAGCCCGGTAGAGTGTA TGGG  | TGACCACAAATACCACA GCTCC | CCAGGAGAAAGGGGAAT TCAGAGAAAT  |
| 2168  | FABP1   | L-FABP                        | fatty acid binding protein 1, liver                                                                            | NM_001443 | GGGAGGAATGTGAGCTG GAGAC | GCCGTTGAGTTCGGTCA CAG   | TGACAGGGGAGAAAGTC AAGACAGTGG  |

|      |        |                                                     |                                                                                                |                                                                                                   |                          |                       |                               |
|------|--------|-----------------------------------------------------|------------------------------------------------------------------------------------------------|---------------------------------------------------------------------------------------------------|--------------------------|-----------------------|-------------------------------|
| 2170 | FABP3  | MDGI                                                | fatty acid binding protein 3, muscle and heart (mammary-derived growth inhibitor)              | NM_004102                                                                                         | TCACCTGCAGAAATGGGACG     | CGTGGGTGAGTGTCAGGATG  | GCAAGAGACCACACTGTGCGGGAGCT    |
| 2167 | FABP4  | A-FABP                                              | fatty acid binding protein 4, adipocyte                                                        | NM_001442                                                                                         | GGGCCAGGAATTTGACGAAG     | TGCACATGTACCAGGACACCC | TGCAGATGACAGGAAAGTCAAGAGCACCA |
| 2172 | FABP6  | ILBP, I-15P, ILBP3, ILLBP, I-BABP                   | fatty acid binding protein 6, ileal (gastrotropin)                                             | NM_001445                                                                                         | AGGCCACTGTGCAGATGGAG     | CTTGCTCACGCGCTCATAGG  | GGGAAGCTGGTGGTGAAATTTCCCAAC   |
| 2179 | FACL1  | LACS, LACS                                          | fatty-acid-Coenzyme A ligase, long-chain 1                                                     | NM_001995                                                                                         | AGGCATCACATTGCACCCTG     | AAATAGTTCCGCAGCTCTGGC | GGCCTTCTGACTCCAACAATGAAGGCG   |
| 2180 | FACL2  | LACS, FACL1, LACS2                                  | fatty-acid-Coenzyme A ligase, long-chain 2                                                     | NM_021122                                                                                         | AGGCATCACATTGCACCCTG     | AAATAGTTCCGCAGCTCTGGC | GGCCTTCTGACTCCAACAATGAAGGCG   |
| 8523 | FACVL1 | VLCS, VLACS                                         | fatty-acid-Coenzyme A ligase, very long-chain 1                                                | NM_003645                                                                                         | CGGTTTCTAAGAATACAGGACACC | TAAAGCCCTCCTCCACCAGG  | TGAGATCACTGGAACTTTAAACACCGCA  |
| 2194 | FASN   |                                                     | fatty acid synthase                                                                            | NM_004104                                                                                         | CGCGGACTACAACCTCTCCC     | CCAGGGAGCTGTGGATGATG  | CCGTCCATATCATCGAGGGTGACCACC   |
| 2203 | FBP1   | FBP                                                 | fructose-1,6-bisphosphatase 1                                                                  | NM_000507                                                                                         | CGTCATGGAGAAGGCTGGG      | GCGCCCTCTGGTGAATGTC   | CACCACTGGGAAGGAGGCCGTGTTAGA   |
| 2208 | FCER2  | CD23, FCE2, CD23A                                   | Fc fragment of IgE, low affinity II, receptor for (CD23A)                                      | NM_002002                                                                                         | CTTCTGCGACCGTAAGCTGG     | GGCCGTCAGGGTCTGGTC    | GAAGGTTCCGCGGAGTCCATGGGAC     |
| 9965 | FGF19  |                                                     | fibroblast growth factor 19                                                                    | NM_005117                                                                                         | GAATCTGACATGTTCTCTTCGCC  | AAAGCTGGGACTCCTCACGG  | CTGGAGACCGACAGCATGGACCCATTT   |
| 2249 | FGF4   | HST, KFGF, HST-1, HSTF1, K-FGF, HBGF-4              | fibroblast growth factor 4 (heparin secretory transforming protein 1, Kaposi sarcoma oncogene) | NM_002007                                                                                         | GCAAGGGCAAGCTCTATGGC     | TTCCATTCTTGCTCAGGAGC  | GCCCTTCTTACCGATGAGTGACAGTT    |
| 2260 | FGFR1  | H2, H3, H4, H5, CEK, FLG, FLT2, BFGFR, C-FGR, N-SAM | fibroblast growth factor receptor 1 (fms-related tyrosine kinase 2, Pfeiffer syndrome)         | NM_000604, NM_015850, NM_023105, NM_023106, NM_023107, NM_023108, NM_023109, NM_023110, NM_023111 | TACGGCAGCATCAACCACAC     | AACTCCACGTTGCTACCAGG  | ATACCAGCTGGATGTCTGGAGCGGTC    |
| 2277 | FIGF   | VEGFD, VEGF-D                                       | c-fos induced growth factor (vascular endothelial growth factor D)                             | NM_004469                                                                                         | CTGCTGCCAGAAGCACAGC      | TTTCTCCTTTGAAAGCGGC   | GTGCAAGTGGCAAACAACATGTGCAA    |
| 2281 | FKBP1B | OTK4, FKBP9, FKBP1L, PKBP1L, PPIase, FKBP12.6       | FK506 binding protein 1B (12.6 kD)                                                             | NM_004116, NM_054033                                                                              | GCCTGTGGGACCGCTATG       | CACACGTTTGGCCCTTCTTG  | GAGATCGAGACCATCTCCCCGGAGAC    |
| 2331 | FMOD   |                                                     | fibromodulin                                                                                   | NM_002023                                                                                         | CCATCAGCAGCTTCTGCACC     | GCTTGATCTCGTTCCCGTCC  | TGAACTTCTCCAAGCTGCAGGTCGTGC   |

|      |         |                                              |                                                                                                  |                                       |                             |                            |                                  |
|------|---------|----------------------------------------------|--------------------------------------------------------------------------------------------------|---------------------------------------|-----------------------------|----------------------------|----------------------------------|
| 2335 | FN1     | FN, CIG, FINC                                | fibronectin 1                                                                                    | NM_002026,<br>NM_054034               | CAAGCTCAAGTGGTCCT<br>GTCC   | AGATGGCTGTGGTGCAT<br>TCC   | CTGAGACTCCGAGTCAG<br>CCCAACTCCC  |
| 2353 | FOS     |                                              | v-fos FBJ murine<br>osteosarcoma viral oncogene<br>homolog                                       | NM_005252                             | CCAGCTGCACTGCTTAC<br>ACG    | GTGGGTGAGCTGAGCGA<br>GTC   | TTCTTCGTCTTCACCTA<br>CCCCGAGGC   |
| 2354 | FOSB    | GOS3                                         | FBJ murine osteosarcoma<br>viral oncogene homolog B                                              | NM_006732                             | TGAAGTTCAAGTCCTCG<br>GCG    | GATCGGAAGGCTGGTCA<br>CTG   | ACCCTTCCCCGTTGTT<br>AACCTTCGT    |
| 8061 | FOSL1   | FRA1, FRA-1                                  | FOS-like antigen 1                                                                               | NM_005438                             | TGAGCCTTGTGCCTCAG<br>CTC    | CAAAGCGAGGAGGGTTG<br>GAG   | AAGAGTAGCAGCAGCAG<br>CGGAGACCCA  |
| 2355 | FOSL2   | FRA2                                         | FOS-like antigen 2                                                                               | NM_005253                             | GGTACCTCCACACCTG<br>CTG     | TACTGCTTCTGCGGTGA<br>GCC   | TCCTAGCGTCTCTGGAGC<br>AGGAGTCACC |
| 2475 | FRAP1   | FRAP, MTOR,<br>FRAP2, RAFT1                  | FK506 binding protein 12-<br>rapamycin associated protein<br>1                                   | NM_004958                             | TTTGGTGAAACCAGAGG<br>CCC    | TGGGATGTCGCTTGT<br>GATG    | TGGATGTTCCAACGCAA<br>GTTGAGCTGC  |
| 2487 | FRZB    | FRP-3, FRZB1,<br>SFRP3, FRZB-PEN             | frizzled-related protein                                                                         | NM_001463                             | CCAGATTACTCTTGGTG<br>GAAGGC | CGAAGCTTCATATCCCA<br>GCG   | AGCTGAGAAGTGGAAGG<br>ATCGACTCGG  |
| 2538 | G6PC    | G6PT, GSD1a                                  | glucose-6-phosphatase,<br>catalytic (glycogen storage<br>disease type I, von Gierke<br>disease)  | NM_000151                             | TGTAGCCTCCCTCGTCC<br>TCC    | GGATGACACTGACGGAT<br>GCC   | CTTGAAACCCCATCCC<br>AAGTCGAGCT   |
| 1647 | GADD45A | DDIT1, GADD45                                | growth arrest and DNA-<br>damage-inducible, alpha                                                | NM_001924                             | TCCTGCTCTTGGAGACC<br>GAC    | TGTGGATTCGTCACCAG<br>CAC   | GAGCAGCCCCGGACCT<br>GCACT        |
| 4616 | GADD45B | MYD118,<br>GADD45BETA,<br>DKFZP566B133       | growth arrest and DNA-<br>damage-inducible, beta                                                 | NM_015675                             | CGAGACCTCCACTGTCT<br>TCCC   | AGTAGCTGGCCACCTCC<br>ACC   | TCCTACAGAACCCTCAC<br>ACGGACGCT   |
| 2586 | GAL     | GALN, GLNN                                   | galanin                                                                                          | M77140                                | CCAGGAAGCTTTGACAG<br>GTCC   | TGTCTTCTGAGGAGGCT<br>GCG   | TTTCTTGCATCTCAAAGA<br>GGCCGGTGC  |
| 2597 | GAPD    | GAPDH                                        | glyceraldehyde-3-phosphate<br>dehydrogenase                                                      | NM_002046                             | GGGCTACACTGAGCACC<br>AGG    | CCCTGTTGCTGTAGCCA<br>AATTC | CCCTCAACGACCACTTT<br>GTCAAGCTCA  |
| 2645 | GCK     | GK, GLK, HK4,<br>HKIV, HXKP,<br>MODY2, NIDDM | glucokinase (hexokinase 4,<br>maturity onset diabetes of the<br>young 2)                         | NM_000162,<br>NM_033507,<br>NM_033508 | CCAGCTGCGAGATCACC<br>TTC    | AGGCCTTCTTACAGGCC<br>ACC   | ATCGAGTCGGAGGAGG<br>GCAGTGCC     |
| 2660 | GDF8    | MSTN                                         | growth differentiation factor 8                                                                  | NM_005259                             | AGAGGTTTCAGCAGGCC<br>TTG    | GAGCACCCACAGCGGTC<br>TAC   | AATATATGGGAAAATTCC<br>AGCGATGGT  |
| 2770 | GNAI1   |                                              | guanine nucleotide binding<br>protein (G protein), alpha<br>inhibiting activity polypeptide<br>1 | NM_002069                             | TCAAACACATATGAAGA<br>GGCAGC | TGGCACATGTGAAGTGG<br>GTG   | CCTCAATAAAAGAAAGG<br>ACACAAAGGA  |
| 2771 | GNAI2   | GIP, GNAI2B                                  | guanine nucleotide binding<br>protein (G protein), alpha<br>inhibiting activity polypeptide<br>2 | NM_002070                             | CAAGTGGTTCACAGACA<br>CGTCC  | AGGGAAGCAGATGGTCA<br>GGG   | TCCTCAACAAGAAGGAC<br>CTGTTTGAGGA |



|       |       |                                    |                                                                                                                                       |                      |                         |                         |                                |
|-------|-------|------------------------------------|---------------------------------------------------------------------------------------------------------------------------------------|----------------------|-------------------------|-------------------------|--------------------------------|
| 2773  | GNAI3 |                                    | guanine nucleotide binding protein (G protein), alpha inhibiting activity polypeptide 3                                               | NM_006496            | GCAGCTGCCTATATTCAATGCC  | TGCACATTCTTCGTGTCTGTGG  | CCAAGGAGATCTATACTCACTTCACCTGTG |
| 2776  | GNAQ  |                                    | guanine nucleotide binding protein (G protein), q polypeptide                                                                         | NM_002072            | GTTCGTGGACCTGAACCAG     | GATGGTGTCTTGACGGCAG     | CACGTGCGCCACAGACACCGAGAATAT    |
| 2778  | GNAS  | GSA, GSP, POH, GPSA, GNAS1, NESP55 | GNAS complex locus                                                                                                                    | NM_000516, NM_016592 | GCTACCCTCATTTCACCTGCG   | TGCATGCGCTGAATGATGTC    | GAGAACATCCGCCGTGTGTTCAACGAC    |
| 2793  | GNGT2 | GNG8, GNGT8, G-GAMMA-8, G-GAMMA-C  | guanine nucleotide binding protein (G protein), gamma transducing activity polypeptide 2                                              | NM_031498            | TGCATTGTGAACCCATTC      | GTTCCCAGCAAGGTCAGCAG    | TCTCCCATTATTTCTCCACCTGCTGGG    |
| 57678 | GPAM  | KIAA1560                           | glycerol-3-phosphate acyltransferase, mitochondrial                                                                                   | AB046780             | TTGCAGTATATGCTGAGAGTGCC | TTTGTTCGGTTGCATTGAGGTAG | TGGGGTTTTCAAGGAGACC            |
| 2821  | GPI   | AMF, NLK, PGI, PHI, GNPI, SA-36    | glucose phosphate isomerase                                                                                                           | NM_000175            | AGTGGAGCTGGGAAAGCAGC    | TGAGCCCATTGGTAGAAGCG    | GAGCCTGAGCTTGATGGCAGTGCTCAA    |
| 2875  | GPT   | AAT1, ALT1, GPT1                   | glutamic-pyruvate transaminase (alanine aminotransferase)                                                                             | NM_005309            | TATGTTCTTCTGCCTGCGCC    | AAGTGGTAGGTGCCTTCCCG    | GAGGAGACCGGCATCTGCGTGGTG       |
| 2890  | GRIA1 | GLUH1, GLUR1, GLURA, HBGR1         | glutamate receptor, ionotropic, AMPA 1                                                                                                | NM_000827            | AGCAATCCATCAACGAAGCC    | GTGGCTCATGCAAGGAATCG    | GTGGTCAGCCATGACTTCCCAAGTCC     |
| 2931  | GSK3A |                                    | glycogen synthase kinase 3 alpha                                                                                                      | NM_019884            | CGCCATTCTCATCCCTCTC     | TGAGGGTAGGTGTGGCAATCG   | CTACCACCCTCACCCCGTCC           |
| 2932  | GSK3B |                                    | glycogen synthase kinase 3 beta                                                                                                       | NM_002093            | TCCACCTCTGGCTACCATCC    | GACGCTGCTGTGGCATTG      | TCATGCTCGGATTCAGCAGCTGCTTC     |
| 2936  | GSR   |                                    | glutathione reductase                                                                                                                 | NM_000637            | TGGGATCCATATGCAGGAGAC   | AGTCTGCCTTCGTTGCTCCC    | GAAATGCTGCAGGGTTTTGCTGTTGCA    |
| 2937  | GSS   | GSHS                               | glutathione synthetase                                                                                                                | NM_000178            | GCATTTCCAGAGCTGGGCATC   | GCTCGATGGCTTTGGTTCCG    | ACACTCGTGATGAACAAACGACGTGGGG   |
| 2997  | GYS1  | GYS                                | glycogen synthase 1 (muscle)                                                                                                          | NM_002103            | ACATCCGTGCACCAGAGTGG    | CCGTGTCCACAGAGTTGCG     | GAGCGTCCTGCACCTCTCCACCAG       |
| 2998  | GYS2  |                                    | glycogen synthase 2 (liver)                                                                                                           | NM_021957            | CTTCAGGGTCTCAGGCCATCC   | CGATCCCTTTCAGCCTCTC     | GCAGTGATGTGGAAGATGAAGTGGAGGA   |
| 8358  | H3FL  | H3/L                               | H3 histone family, member L                                                                                                           | NM_003537            | AGAGCTCTGCGGTAATGGCG    | TTAGCATGGATGGCGCAAAG    | TGCAGGAGGCTTGTGAGCCCTACTTGG    |
| 3030  | HADHA | GBP, MTPA                          | hydroxyacyl-Coenzyme A dehydrogenase/3-ketoacyl-Coenzyme A thiolase/enoyl-Coenzyme A hydratase (trifunctional protein), alpha subunit | NM_000182            | CCTTTCCGCTTTGTGGATCTG   | GGGCTGTTAGCATGGTCAAGC   | ATGGAAAACAGTTCACC              |

|      |        |                                              |                                                                                                                                      |                                                                   |                           |                             |                                   |
|------|--------|----------------------------------------------|--------------------------------------------------------------------------------------------------------------------------------------|-------------------------------------------------------------------|---------------------------|-----------------------------|-----------------------------------|
| 3032 | HADHB  | HADH                                         | hydroxyacyl-Coenzyme A dehydrogenase/3-ketoacyl-Coenzyme A thiolase/enoyl-Coenzyme A hydratase (trifunctional protein), beta subunit | NM_000183                                                         | GGGTGGATCTCTGTCCC<br>TGG  | CTGCACACGCAGCCACT<br>AAG    | CATGGCTGCTGCCAACA<br>GATTACGGAA   |
| 3033 | HADHSC | SCHAD                                        | L-3-hydroxyacyl-Coenzyme A dehydrogenase, short chain                                                                                | NM_005327                                                         | CGAAGTTCATCGTGGAT<br>GGG  | TCCAGTCTTCTTGCCGA<br>ACTTG  | ACCCATTACATCAGCCC<br>AGCCCATCCT   |
| 3082 | HGF    | HPTA                                         | hepatocyte growth factor (hepapoietin A; scatter factor)                                                                             | L02931                                                            | ATCAGACACCACACCGG<br>CAC  | TTGCACAGTACTCCCAG<br>CGG    | ATAATTATTGCCGCAATC<br>CCGATGGCC   |
| 3098 | HK1    | HKI, HXK1                                    | hexokinase 1                                                                                                                         | NM_000188,<br>NM_033496,<br>NM_033497,<br>NM_033498,<br>NM_033500 | TGTGACTGTGGGAGTGG<br>ACG  | TGCCATCCTCAGACAGG<br>AGG    | CCAGAATCATGCACCAG<br>ACGGTGAAGG   |
| 3099 | HK2    | HKII, HXK2                                   | hexokinase 2                                                                                                                         | NM_000189                                                         | CCTGGCTCCGAAATGTG<br>ATG  | AGGCCACAGCAGTGATG<br>AGC    | TCTTTCCTGCAGTCAGA<br>GGATGGCAGC   |
| 3101 | HK3    | HXK3, HKIII                                  | hexokinase 3 (white cell)                                                                                                            | NM_002115                                                         | GAGCTGGCAGTGTCTGT<br>GGG  | GAACGTGACCACACAGC<br>GAG    | GGATGGAACGCTCTACA<br>AGCTGCACCC   |
| 3155 | HMGCL  | HL                                           | 3-hydroxymethyl-3-methylglutaryl-Coenzyme A lyase (hydroxymethylglutaricaciduria)                                                    | NM_000191                                                         | ACATGCTAGAGGGCTTG<br>GGC  | AGCCTGAGCCACTTTGG<br>AGC    | TTCACACGGGTGTGAAT<br>CTCCAGAAGC   |
| 3156 | HMGCR  |                                              | 3-hydroxy-3-methylglutaryl-Coenzyme A reductase                                                                                      | NM_000859                                                         | GTGTGGGACCGTAATGG<br>CTG  | TCTTGGTGAAGCTCCT<br>TGG     | TTATGGCAGCATTGGCA<br>GCAGGACATC   |
| 3157 | HMGCS1 | HMGCS                                        | 3-hydroxy-3-methylglutaryl-Coenzyme A synthase 1 (soluble)                                                                           | NM_002130                                                         | AGAACTTACGCTCGGCG<br>TCC  | ACTTTCCTTGGCAGGGCT<br>TGG   | TGTGCATTCAAACATAGC<br>AACTGAGCA   |
| 3158 | HMGCS2 |                                              | 3-hydroxy-3-methylglutaryl-Coenzyme A synthase 2 (mitochondrial)                                                                     | NM_005518                                                         | CCCACCTGGTGACACAA<br>ACAG | CATACTTTCGGCGATGC<br>TGC    | GGTACTTGGTACCTGGA<br>GCGAGTGGACGA |
| 3162 | HMOX1  | HO-1, bK286B10                               | heme oxygenase (decycling) 1                                                                                                         | NM_002133                                                         | AGACTCCCAGAGGGAAG<br>CCC  | CTGTCCGCCACCAGAAAG<br>CTG   | GCTCCGCTTCTCCGATG<br>GGTCCTTACA   |
| 3172 | HNF4A  | TCF, HNF4, MODY, MODY1, NR2A1, TCF14, NR2A21 | hepatocyte nuclear factor 4, alpha                                                                                                   | NM_000457                                                         | CGGACAGATGTGTGAGT<br>GGC  | CTTGACGATTGTGGCGA<br>CG     | TCTGAGCCCTATAAGCT<br>CCTGCCGGGA   |
| 9456 | HOMER1 | SYN47, HOMER-1B                              | Homer, neuronal immediate early gene, 1B                                                                                             | NM_004272                                                         | CGGAACAAAGACCTGGA<br>GGG  | AAGAGTGTCTTCAGGTT<br>ATTGCG | GCAACGTCTGGAGAAAA<br>GTCAGAATGA   |
| 9455 | HOMER2 | HOMER-2B, HOMER-2, HOMER-2A                  | Homer, neuronal immediate early gene, 2                                                                                              | NM_004839                                                         | GGAGAGCAAATACCGAC<br>AGCG | TGCAGGTCGTCAATCTT<br>CCC    | TTGAAGAGCTTCTGGA<br>GGTGTGGAC     |

|      |         |                                      |                                                                         |           |                            |                              |                                    |
|------|---------|--------------------------------------|-------------------------------------------------------------------------|-----------|----------------------------|------------------------------|------------------------------------|
| 9454 | HOMER3  | HOMER-3                              | Homer, neuronal immediate early gene, 3                                 | NM_004838 | AGCAGAAGGTGCAGACC<br>CG    | TCAGCTCAAACAGGCTG<br>ACG     | CAATGCGGAGTTGGAGC<br>ACCAGCTG      |
| 3267 | HRB     | RAB, RIP                             | HIV-1 Rev binding protein                                               | NM_004504 | TTTCTCAACAGCCCAATG<br>GTG  | CCAGCAGCTGCAACTTG<br>ACC     | TTTGCAGCATTTGGACAA<br>ACAAAGCCA    |
| 8739 | HRK     | DP5, HARAKIRI                        | harakiri, BCL2 interacting protein (contains only BH3 domain)           | NM_003806 | CAAGGCGCTAGGCGAC<br>G      | ACAGCCAAGGCCAGTAG<br>GTG     | AGCTGCACCAGCGCACC<br>ATGT          |
| 3290 | HSD11B1 | HSD11, HSD11B, HSD11L                | hydroxysteroid (11-beta) dehydrogenase 1                                | NM_005525 | AGGAGGAATGTGCCCTG<br>GAG   | CAGAAGAGTGGTCCAGA<br>GTGAGC  | GGGGAGCTCTGCGCCAA<br>GAAGAAGTGT    |
| 3309 | HSPA5   | BIP, MIF2, GRP78                     | heat shock 70kD protein 5 (glucose-regulated protein, 78kD)             | NM_005347 | GCCACCAAGATGCTGAC<br>ATTG  | GGGCTGCACTTCCATA<br>GAG      | GAAGGAAGTGAAGAAA<br>TTGTTCAACCA    |
| 3381 | IBSP    | BSP, BNSP, SP-II, BSP-II             | integrin-binding sialoprotein (bone sialoprotein, bone sialoprotein II) | NM_004967 | CGGGCGTCAATGAATAC<br>GAC   | TTCATAGGCTCGTAATT<br>GTCCC   | ATGAAAGTGAGAACGGG<br>GAACCTCGTG    |
| 3383 | ICAM1   | BB2, CD54                            | intercellular adhesion molecule 1 (CD54), human rhinovirus receptor     | NM_000201 | CTGTGGTAGCAGCCGCA<br>GTC   | GAGGCGTGGCTTGTGTG<br>TTC     | CTACAACAGGCCCAAAA<br>AGGGACCCCC    |
| 3398 | ID2     |                                      | inhibitor of DNA binding 2, dominant negative helix-loop-helix protein  | NM_002166 | GTCAGCCTGCATCACCA<br>GAG   | TCAGCCACACAGTGCTT<br>TGC     | CGCTGACCACCCTCAAC<br>ACGGATATCA    |
| 3434 | IFIT1   | G10P1, IFI56, ISG56, IFNAI1, GARG-16 | interferon-induced protein with tetratricopeptide repeats 1             | NM_001548 | CTTGAGCCTCCTTGGGT<br>TCG   | GTCTCAGGGCCCCTCA<br>TAG      | TGGAAGGAAATATGAAT<br>GAAGCCCTGGA   |
| 3439 | IFNA1   | IFNA@                                | interferon, alpha 1                                                     | NM_024013 | CGGACTCCATCTTGGCT<br>GTG   | TGCTCTGACAACCTCCC<br>AGG     | TGACAGAGAAGAAATAC<br>AGCCCTTGTG    |
| 3456 | IFNB1   | IFNB                                 | interferon, beta 1, fibroblast                                          | NM_002176 | TGCATTACCTGAAGGCC<br>AAGG  | TTTCGGAGGTAACCTGT<br>AAGTCTG | TCACTGTGCCTGGACCA<br>TAGTCAGAGTGGA |
| 3458 | IFNG    |                                      | interferon, gamma                                                       | NM_000619 | TTGAATGTCCAACGCAA<br>AGC   | TGGGATGCTCTTCGACC<br>TTG     | TGTGCGCCAGCAGCTAAA<br>ACAGGGAAGC   |
| 3467 | IFNW1   |                                      | interferon, omega 1                                                     | NM_002177 | TTAGCAGCCCTGCACTG<br>ACC   | AACTTCCCAGGCACAGT<br>CGC     | TGAGGAGGTACTTCCAG<br>GGAATCCGTG    |
| 3479 | IGF1    |                                      | insulin-like growth factor 1 (somatomedin C)                            | NM_000618 | TGGAGATGTATTGCGCA<br>CCC   | CTTCTTCTGGGTCTTG<br>GGC      | AAGCCTGCCAAGTCAGC<br>TCGCTCTGTC    |
| 3480 | IGF1R   | JTK13                                | insulin-like growth factor 1 receptor                                   | NM_000875 | CTGCCCGACAGACTC<br>AGG     | TGTCTCTCGTCGAAGCT<br>GGC     | ACACAAGGCCGAGAACG<br>GCCCC         |
| 3481 | IGF2    |                                      | insulin-like growth factor 2 (somatomedin A)                            | NM_000612 | GACACCTGGAAGCAGTC<br>CACC  | GACGTTTGGCCTCCCTG<br>AAC     | GGTCACGTGCTCGCCAA<br>GGAGCTC       |
| 3485 | IGFBP2  | IBP2                                 | insulin-like growth factor binding protein 2 (36kD)                     | NM_000597 | TGACAAGCATGGCCTGT<br>ACAAC | CTGGATCAGCTTCCCGG<br>TG      | AGTGCAAGATGTCTCTG<br>AACGGGCAGC    |
| 3487 | IGFBP4  |                                      | insulin-like growth factor binding protein 4                            | NM_001552 | GTGGCAAGTGCTGGTGT<br>GTG   | CTGGTGGCAGTCCAGCT<br>CC      | GACCGGAAGACGGGGG<br>TGAAGCTTC      |
| 3488 | IGFBP5  | IBP5                                 | insulin-like growth factor binding protein 5                            | NM_000599 | AAGCAGTGCAAACCTTC<br>CCG   | CCGTCAACGTACTION<br>GCC      | TGGTGCCTGGACAAGTA<br>CGGGATGAAG    |

|       |        |                                 |                                                                                                           |           |                           |                          |                                |
|-------|--------|---------------------------------|-----------------------------------------------------------------------------------------------------------|-----------|---------------------------|--------------------------|--------------------------------|
| 3551  | IKBKB  | IKK2, NFKB1KB, IKK-beta         | inhibitor of kappa light polypeptide gene enhancer in B-cells, kinase beta                                | AF029684  | ACGGCCTCCAACAGCTT ACC     | AGCTCCAGTCTAGGGCC GTG    | TGGCTGAAGCACATAAC CTCTGCACCC   |
| 3586  | IL10   | CSIF, TGIF, IL10A               | interleukin 10                                                                                            | NM_000572 | CGCTGTCATCGATTTCTT CCC    | TCACTCATGGCTTTGTAG ATGCC | GAAAACAAGAGCAAGGC CGTGGAGCAG   |
| 3587  | IL10RA | IL10R, HIL-10R, IL-10R1         | interleukin 10 receptor, alpha                                                                            | NM_001558 | TCACTCCTGGCCTTGAG CAG     | GCAGGGTGACCAGGTCT GAG    | CTTTGCCCATGACCTTG CCCCTCTAGG   |
| 3592  | IL12A  | CLMF, NKSF1                     | interleukin 12A (natural killer cell stimulatory factor 1, cytotoxic lymphocyte maturation factor 1, p35) | NM_000882 | CATGCTGGCAGTTATTG ATGAGC  | AATCCGGTTCTTCAAGG GAGG   | TGATGCAGGCCCTGAAT TTCAACAGTGA  |
| 3593  | IL12B  | CLMF, NKSF2                     | interleukin 12B (natural killer cell stimulatory factor 2, cytotoxic lymphocyte maturation factor 2, p40) | NM_002187 | TCACCGACAAGACCTCA GCC     | AGATGCCCATTCGCTCC AAG    | TCATCTGCCGCAAAAAT GCCAGCATTA   |
| 3606  | IL18   | IGIF                            | interleukin 18 (interferon-gamma-inducing factor)                                                         | NM_001562 | CCTTTAAGGAAATGAATC CTCCTG | TCATGTCCTGGGACACT TCTCTG | ACATCAAGGATACAAAA AGTGACATCA   |
| 3552  | IL1A   | IL1                             | interleukin 1, alpha                                                                                      | NM_000575 | TTCTGGGAAACTCACGG CAC     | TGCCAAGCACACCCAGT AGTC   | TGCCCATCCAAACTTGT TATTGCCACA   |
| 3553  | IL1B   |                                 | interleukin 1, beta                                                                                       | NM_000576 | TTTGAGTCTGCCAGTT CCC      | TATATCCTGGCCGCCTT GG     | AGAAAACATGCCCGTCT TCCTGGGAGG   |
| 3554  | IL1R1  | IL1R, IL1RA, D2S1473            | interleukin 1 receptor, type I                                                                            | NM_000877 | CAGCGACGGTCACCTTC ATC     | GGCACGTGAGCCTCTCT TTG    | CACCAGTTACTGTCACC AGCCACTAAGGA |
| 7850  | IL1R2  | IL1RB                           | interleukin 1 receptor, type II                                                                           | NM_004633 | CGCACCACAGTCAAGGA AGC     | CGTCTGTGCATCCATATT CCC   | GCCCCACTTTCCTGGC CTCTTTGGTT    |
| 3558  | IL2    |                                 | interleukin 2                                                                                             | NM_000586 | CCCAGGGACTTAATCAG CAATATC | CAATGGTTGCTGTCTCAT CTGC  | GGGATCTGAAACAACAT TCATGTGTGA   |
| 3562  | IL3    |                                 | interleukin 3 (colony-stimulating factor, multiple)                                                       | NM_000588 | ACCCACGCGACATCCAA TC      | AGTCGTCTGTTGAGCCT GCG    | CGGTGACTGGAATGAAT TCCGGAGGAA   |
| 3565  | IL4    |                                 | interleukin 4                                                                                             | NM_000589 | GTTCCACAGGCACAAGC AGC     | ACAGGAATTCAAGCCCG CC     | CTGAAACGGCTCGACAG GAACCTCTGG   |
| 3569  | IL6    | BSF2, IFNB2                     | interleukin 6 (interferon, beta 2)                                                                        | NM_000600 | AGCTGCAGGCACAGAAC CAG     | ATTTGCCGAAGAGCCCT CAG    | TCTGCGCAGCTTTAAGG AGTTCCTGCA   |
| 3572  | IL6ST  | CD130, GP130                    | interleukin 6 signal transducer (gp130, oncostatin M receptor)                                            | NM_002184 | CCTGTGGATCTGGGCAA ATG     | ATGCCTTCATCAGTCGC AGC    | TTCTGCAGCAGATGCTTT TGGTCCAGG   |
| 3576  | IL8    | LECT, LUCT, MDNCF, SCYB8, TSG-1 | interleukin 8                                                                                             | NM_000584 | GACCACACTGCGCCAAC AC      | CACAACCCTCTGCACCC AG     | TGGAAGAGAGCTCTGTC TGGACCCCAA   |
| 3611  | ILK    | P59                             | integrin-linked kinase                                                                                    | NM_004517 | TGGAATGAAGGTGGCAT TGG     | GGTCGCTTTGCAGGGTC TTC    | CGGCCTACCATCCCACC AGGTATTTCC   |
| 55522 | ILK-2  |                                 | integrin-linked kinase-2                                                                                  | AJ277481  | AGAGGTGCCCTTTGCTG ACC     | CCTGGTGAATTGTAGG CCG     | GGAATGAAGGTGGCACT GGAAGGCCTT   |
| 3643  | INSR   |                                 | insulin receptor                                                                                          | NM_000208 | ACTGTCAGAGGGAGGAG GCG     | TGCCTCCGTTTCATGTGT GTG   | CAAGCGGAGCTACGAGG AACACATCCC   |

|       |       |                                    |                                                                                                                              |                      |                       |                      |                               |
|-------|-------|------------------------------------|------------------------------------------------------------------------------------------------------------------------------|----------------------|-----------------------|----------------------|-------------------------------|
| 3654  | IRAK1 | IRAK, pelle                        | interleukin-1 receptor-associated kinase 1                                                                                   | NM_001569            | GCATCATCGTCGTCAGAGCC  | TCGTACAGGGCCAGCTTCTG | CGCAGATTATCATCAACCTGCCCCGAC   |
| 3656  | IRAK2 | IRAK-2                             | interleukin-1 receptor-associated kinase 2                                                                                   | NM_001570            | TGCCTCCTCCTCCATGAGTG  | AGGCTCCAGGCCAACACAG  | GGGAAGGGAGGCTGACTCCTCCTCTGA   |
| 11213 | IRAK3 | IRAK-M                             | interleukin-1 receptor-associated kinase M                                                                                   | NM_007199            | TTGCAACATGCCAGTTCCTC  | GCTCTCCACTGGCCTGCTC  | TCTTCAGAAGCTCCAGGCGATTCTTGCA  |
| 3667  | IRS1  | HIRS-1                             | insulin receptor substrate 1                                                                                                 | NM_005544            | TGAGAGCAGCTCCACCCG    | GGTCTCTGGCTGCTTCG    | GTGAGGATTTAAGCGCCGATGCCAGCA   |
| 8660  | IRS2  |                                    | insulin receptor substrate 2                                                                                                 | NM_003749            | GGCTTGGTCGGTTGTCCG    | CGTCGATGGCGATGTACTG  | GCAGAGAGACCTCTGCCGTTTCCAGA    |
| 9636  | ISG15 | G1P2, IFI15, UCRP                  | interferon-stimulated protein, 15 kDa                                                                                        | NM_005101            | CTGAAGCAGCAAGTGAGCGG  | GGGCTTGAGGCCGCTACTCC | GCAGGACGACCTGTTCTGGCTGACCTT   |
| 3681  | ITGAD | CD11d                              | integrin, alpha D                                                                                                            | U37028               | TCATCATGGGCAGCTCTGTG  | GGCGTTTGAAGAAGCCAGC  | GGCGCTCATCACAGCCACTGTACAA     |
| 3683  | ITGAL | CD11A, CD11a, LFA-1, LFA1A         | integrin, alpha L (antigen CD11A (p180), lymphocyte function-associated antigen 1; alpha polypeptide)                        | NM_002209            | GGCAGAGGTGTCCCGAATG   | TCAGTCCTTGCCACCACAC  | AAGACTCTGAGCAGCTGCGATCTGGGC   |
| 3684  | ITGAM | CR3A, CD11B, CD11b, MAC-1, MAC1A   | integrin, alpha M (complement component receptor 3, alpha; also known as CD11b (p170), macrophage antigen alpha polypeptide) | NM_000632            | GTTTGTGAGGTCCCAGACGG  | ACAGAGCTGCCACGATGAG  | AGACCAAAGTGGAGCCGTTGAGGTCC    |
| 3687  | ITGAX | CD11C, CD11c                       | integrin, alpha X (antigen CD11C (p150), alpha polypeptide)                                                                  | NM_000887            | TTGCTGCTGGCACTCATCAC  | TCATTTCTCACTGGGCGGG  | CAAATTGCCCCAGAAAA CGGGACACAG  |
| 3725  | JUN   |                                    | v-jun sarcoma virus 17 oncogene homolog (avian)                                                                              | NM_002228            | GAAGCTGGAGAGAATCGCCC  | TGTTCCCTGAGCATGTTGGC | TGAAAGCTCAGAACTCGGAGCTGGCGT   |
| 3726  | JUNB  |                                    | jun B proto-oncogene                                                                                                         | NM_002229            | AGGTGGCCCAGCTCAAA CAG | AGAAGGCGTGTCCCTTGACC | AAGGTCATGACCCACGT CAGCAACGG   |
| 3727  | JUND  |                                    | jun D proto-oncogene                                                                                                         | NM_005354            | TCGCGCCTGGAAGAGAAAG   | CGCTGTTGACGTGGCTGAG  | AAGAGTCAGAACACGGAGCTGGCGTCC   |
| 3914  | LAMB3 | LAMNB1                             | laminin, beta 3 (nicein (125kD), kalinin (140kD), BM600 (125kD))                                                             | NM_000228            | CGGACCTGACAGGACTGGAG  | GCAGGTGGCATAGTAGAGC  | GTGTGGAGCAGATCCGTGACCACATCA   |
| 3918  | LAMC2 | EBR2, BM600, EBR2A, LAMB2T, LAMNB2 | laminin, gamma 2 (nicein (100kD), kalinin (105kD), BM600 (100kD), Herlitz junctional epidermolysis bullosa))                 | NM_005562, NM_018891 | GAGCTGGAAAGGAAGGAGCTG | CCCAGCGTTCTTGGCTCTG  | TGGTGATTACAGAAGCC CAGAAGGTTGA |
| 3931  | LCAT  |                                    | lecithin-cholesterol acyltransferase                                                                                         | NM_000229            | AGCTCTGTGGCCTGTGGC    | TGTGCTCCAGGGTCAGGTTG | CCCTGCACGGGATACAGCATCTCAACA   |

|       |          |                         |                                                                               |                                 |                        |                       |                              |
|-------|----------|-------------------------|-------------------------------------------------------------------------------|---------------------------------|------------------------|-----------------------|------------------------------|
| 3949  | LDLR     | FH, FHC                 | low density lipoprotein receptor (familial hypercholesterolemia)              | NM_000527                       | CTCGTCTTCCTTTGCCTGGG   | TGTAGCCGTCCTGGTTGTGG  | TCAACAGCATCAACTTTGACAACCCCG  |
| 3952  | LEP      | OB, OBS                 | leptin (obesity homolog, mouse)                                               | NM_000230                       | CCTCCGGGATCTTCTTCACG   | CCCAGGCTGTCCAAGGCTCTC | TCTCTAAGAGCTGCCAC TTGCCCTGGG |
| 3977  | LIFR     |                         | leukemia inhibitory factor receptor                                           | NM_002310                       | TCCATGCTCCATTAATTC CCG | TTGTAAAGGACCACCCTCTCC | TGATTCTCCTAAAGATG AAGACTCTCC |
| 3990  | LIPC     | HL                      | lipase, hepatic                                                               | NM_000236                       | ATCATCCCATGGAGCACAGG   | TCCTGGGTTGGGCGAAGTAG  | GCCACTCAGGCCTCGTTCTGAAGACGA  |
| 3991  | LIPE     | HSL, LHS                | lipase, hormone-sensitive                                                     | NM_005357                       | CAGCCGGTGACGCTGC       | CTCTGCGGCCTGGCG       | GCTTCCTGACCCTAGCG GCGCTGT    |
| 4018  | LPA      | LP                      | lipoprotein, Lp(a)                                                            | NM_005577                       | AGTGGAGGGCCTCTGGTTTG   | GGCGTGCACAGCCAAGAC    | ACATTTTACAAGGAGTCACTTCTTGGG  |
| 4023  | LPL      | LIPD                    | lipoprotein lipase                                                            | NM_000237                       | GCTGGTCAGACTGGTGGAGC   | TCACAAATACCGCAGGTGCC  | AGTCCCGGCTTCGCCATTCAGAAGATC  |
| 4035  | LRP1     | APR, LRP, A2MR          | low density lipoprotein-related protein 1 (alpha-2-macroglobulin receptor)    | NM_002332                       | TGATGTGGGAGGCCTACTGG   | GTTCTCGCTTCTCGTCCGTG  | CTGACTTTGCCCTGGACCCTGACAAGC  |
| 7804  | LRP8     | APOER2, HSZ75190        | low density lipoprotein receptor-related protein 8, apolipoprotein e receptor | NM_004631, NM_017522, NM_033300 | GGCTCAATGGCCTGGAAATC   | AGGCATCTGGAGCTCTTGGC  | CCTGGCTGAGAACCTCAACAACCCACA  |
| 4099  | MAG      | GMA, S-MAG, SIGLEC-4A   | myelin associated glycoprotein                                                | NM_002361                       | GCCTGGGATCTGAGAGGAGG   | CCGTCAGCGTGTAGCTGTCC  | GCCCCAGAGCTGGACCTGAGCTATTC   |
| 9479  | MAPK8IP1 | IB1, JIP-1, PRKM8IP     | mitogen-activated protein kinase 8 interacting protein 1                      | NM_005456                       | GTTTGCCTGCCACGTCTTTG   | AGAAGTCTGGAATGCTCTCCC | CTGAAGACTCCACCAAA GCCCTGGCAG |
| 23542 | MAPK8IP2 | IB2, JIP2, PRKM8IPL     | mitogen-activated protein kinase 8 interacting protein 2                      | NM_012324, NM_016431            | GCCTGCCACGTCTTTGTCTC   | CAGGTAGATGTCCTCCGTGGG | GCCGCGCCTTCTGGAGTACTACCAAG   |
| 4143  | MAT1A    | MAT, SAMS, MATA1, SAMS1 | methionine adenosyltransferase I, alpha                                       | NM_000429                       | AGAGCTGCTGGATGTGGTGC   | ATGGGAAGTCTGCTTCTTCCG | GGGCGTCATTGTCAGGG ATTTGGACTT |
| 4144  | MAT2A    | MATA2, MATII, SAMS2     | methionine adenosyltransferase II, alpha                                      | NM_005911                       | GAATTTGATCTCCGCCCTG    | ACCAAAGTGGCCATAGGCTG  | TGTCAGGGATCTGGATCTGAAGAAGCCA |
| 27430 | MAT2B    | TGR, MAT-II             | methionine adenosyltransferase II, beta                                       | NM_013283                       | TCCTAGGAGCACAACGTCCG   | TCGAAATGGTGTTCGTTGGC  | ACTGCTCCAAATTGGAGACCTTGGGCA  |
| 4146  | MATN1    | CMP, CRTM               | matrilin 1, cartilage matrix protein                                          | NM_002379                       | TCTGTGTGGAGGAAGACCCG   | TCCAGTTTCTGGTCAGGGC   | CGAGTCCCTGGTGAAT TCCAAGCCAA  |
| 8720  | MBTPS1   | S1P, SKI-1, KIAA0091    | membrane-bound transcription factor protease, site 1                          | NM_003791                       | GATCATGCCTGGCCGCTAC    | CAAAGAAGGCCAGGACCACC  | AGGAGGTGGGCCAGACCATTCTGTCT   |
| 51360 | MBTPS2   | S2P                     | membrane-bound transcription factor protease, site 2                          | NM_015884                       | TGGATGCCACCCTTACCTCAG  | AGTCCCAGGGTACATTGGC   | AGGGTTTTTCATCTTGCTGGGTGGCAG  |

|       |       |                         |                                                                                      |                                                                  |                             |                           |                                 |
|-------|-------|-------------------------|--------------------------------------------------------------------------------------|------------------------------------------------------------------|-----------------------------|---------------------------|---------------------------------|
| 4193  | MDM2  | hdm2                    | Mdm2, transformed 3T3 cell double minute 2, p53 binding protein (mouse)              | NM_002392, NM_006878, NM_006879, NM_006880, NM_006881, NM_006882 | TGCCTCAATTCACATAGATTTCTTCTC | GGAGTTGGTGTAAGGATGAGCTAC  | TGACCTACTTTGGTAGTGAATAGTGA      |
| 4199  | ME1   | HUMNDME                 | malic enzyme 1, NADP(+)-dependent, cytosolic                                         | NM_002395                                                        | AGAAGCATTTGTCCGCTCCC        | CTGCACCTCTTCAGGCCAAG      | TGATTATGACCAGATTCTACCTGATTG     |
| 4233  | MET   | HGFR                    | met proto-oncogene (hepatocyte growth factor receptor)                               | NM_000245                                                        | GGAGCACTATGTCCATGTGAACG     | GTCTCCCAGAAGGAGGCTGG      | ATGTGAACGTAAAATGTGTCGCTCCGT     |
| 4256  | MGP   |                         | matrix Gla protein                                                                   | NM_000900                                                        | TCCGAGAACGCTCTAAGCCTG       | AACCATGGCGTAGCGTTCCG      | TCCACGAGCTCAATAGGGAAGCCTGTGA    |
| 23417 | MLYCD | MCD, hMCD               | malonyl-CoA decarboxylase                                                            | NM_012213                                                        | TGGCATCTGTATGAGCCCAG        | GTAAGGTTTGGGACGGGCAG      | GGGTCTCCTCAGCACAGCCCCTCTACC     |
| 4312  | MMP1  | CLG                     | matrix metalloproteinase 1 (interstitial collagenase)                                | NM_002421                                                        | TCCTGGAATTGGCCACAAG         | TTTCCTGCAGTTGAACCAAGC     | TGATGCAGTTTTTCATGAAAGATGGATT    |
| 4322  | MMP13 | CLG3                    | matrix metalloproteinase 13 (collagenase 3)                                          | NM_002427                                                        | GAAGAAGACTTCCCAGGAATTGG     | GGCATGACGCGAACAATACG      | CGGACCCATACAGTTTGAATACAGCATCTGG |
| 4313  | MMP2  | CLG4, CLG4A, TBE-1      | matrix metalloproteinase 2 (gelatinase A, 72kD gelatinase, 72kD type IV collagenase) | NM_004530                                                        | AAGCTCATCGCAGATGCTG         | AGAAGTAGCTGTGACCGCCG      | GATAACCTGGATGCCGTGCGTGGACCTG    |
| 4314  | MMP3  | SL-1, STMY, STR1, STMY1 | matrix metalloproteinase 3 (stromelysin 1, progelatinase)                            | NM_002422                                                        | TTCCATGGAGCCAGGCTTTC        | TGCATTTGGGTCAAACCTCAAC    | TCCAGGGATTGACTCAAGATTGATGCTG    |
| 4318  | MMP9  | GELB, CLG4B             | matrix metalloproteinase 9 (gelatinase B, 92kD gelatinase, 92kD type IV collagenase) | NM_004994                                                        | CGAGGTGGACCGGATGTC          | GCGGTCTGGCAGAAATAGG       | CGCACGACGTCTTCCAGTACCGAGAGA     |
| 4350  | MPG   | MDG                     | N-methylpurine-DNA glycosylase                                                       | NM_002434                                                        | AGCTGTATGGCTGGAGCGTG        | GTCGACCACACTGACCCAGG      | GAAACCCCTCCGCTTCTATGTCCGGG      |
| 4481  | MSR1  |                         | macrophage scavenger receptor 1                                                      | NM_002445                                                        | GAACAAGTGCATTTGGAACAGG      | TGAGAATGTTCCCAATCTTTCAGTC | GGAGAAGTGAAAGTACTGAATAACATCA    |
| 4487  | MSX1  | HOX7, HYD1              | msh homeo box homolog 1 (Drosophila)                                                 | NM_002448                                                        | CTCGCTCTACGGTGCCTCTG        | TGGTACATGCTGTAGCCCAC      | CCCGTGGGACTCTACACGGCCAT         |
| 4524  | MTHFR |                         | 5,10-methylenetetrahydrofolate reductase (NADPH)                                     | NM_005957                                                        | TCCCACTGGACAACCTGCTC        | CCGTTTCTCTCGCATTCTGG      | TGGCAGGTGGTGGGAAGACACATTGGAG    |
| 4547  | MTP   |                         | microsomal triglyceride transfer protein (large polypeptide, 88kD)                   | NM_000253                                                        | AAAGGCTGTCCACAGGCAGAG       | GAGTTCTCTTGATGGAGCGGG     | GAAAAGAAAGCGTATTAGCAGGATGTGA    |

|      |        |                         |                                                                                       |           |                          |                           |                                  |
|------|--------|-------------------------|---------------------------------------------------------------------------------------|-----------|--------------------------|---------------------------|----------------------------------|
| 4599 | MX1    | MX, MXA, IFI78, IFI-78K | myxovirus (influenza virus) resistance 1, interferon-inducible protein p78 (mouse)    | NM_002462 | CTCCAGACGTACGGCCAGC      | CCTTCAGGAACCTCCGCTTG      | CACCTACAGCTGGCTCC<br>TGAAGGAGCG  |
| 4609 | MYC    |                         | v-myc myelocytomatosis viral oncogene homolog (avian)                                 | NM_002467 | CATCCTGTCCGTCCAAGCAG     | CGCACAAGAGTTCCGTA<br>GCTG | TGAAGAGGACTTGTGCG<br>GAAACGACG   |
| 4617 | MYF5   |                         | myogenic factor 5                                                                     | NM_005593 | GGACCGGATCACCTCCTCAG     | GAATCGGTGCTGGCAAC<br>TG   | CAACCTGGGTTGCCTCT<br>CCAGGATCTG  |
| 4618 | MYF6   | MRF4                    | myogenic factor 6 (herculin)                                                          | NM_002469 | TCAGCCTCGAGTAGCCTTCG     | TCTCCACCACTTCCCTCCACG     | ATTTCTCGGAGGAACG<br>CAAACCCCC    |
| 4654 | MYOD1  | PUM, MYF3, MYOD         | myogenic factor 3                                                                     | NM_002478 | ACGTGCCTTCTGAGTCGCC      | CACCTGGTATATCGGGT<br>TGGG | AGGGAGAGAGCAGCGG<br>CGACCC       |
| 4656 | MYOG   | MYF4                    | myogenin (myogenic factor 4)                                                          | NM_002479 | GATGCCCAACCTGCACTC       | TTGGGCATGGTTTCATCT<br>GG  | CTCCATCGTGGACAGCA<br>TCACAGTGGAA |
| 4684 | NCAM1  | CD56, NCAM              | neural cell adhesion molecule 1                                                       | NM_000615 | GGGAAACACACAGAGCCCAAC    | TGTCTGTGTGGCGTCAT<br>TGG  | GTGCCAGGAGACAGAAA<br>CGAAGCCAGC  |
| 4790 | NFKB1  | KBF1                    | nuclear factor of kappa light polypeptide gene enhancer in B-cells 1 (p105)           | NM_003998 | CTCTCTCGCCTGCCTCCAC      | TTGCGGAAGGATGTCTC<br>CAC  | GCTCCGAGACAGTGACA<br>GTGTCTGCGA  |
| 4791 | NFKB2  | LYT10, LYT-10           | nuclear factor of kappa light polypeptide gene enhancer in B-cells 2 (p49/p100)       | NM_002502 | AGGGAGTGAGGCTGCTGAGG     | CTGCCTCCTGCTCCACT<br>GAC  | AGCTGCCCAGCACAGAG<br>GTGAAGGAAG  |
| 4792 | NFKBIA | IKBA, MAD-3, NFKBI      | nuclear factor of kappa light polypeptide gene enhancer in B-cells inhibitor, alpha   | NM_020529 | CAAGCACCCGGATACAGCAG     | GGGCAGCTCGTCCTCTG<br>TG   | TGCTGCCAGAGAGTGAG<br>GATGAGGAGA  |
| 4793 | NFKBIB | IKBB, TRIP9             | nuclear factor of kappa light polypeptide gene enhancer in B-cells inhibitor, beta    | NM_002503 | CTTCATTTGGCAGTGGA<br>GGC | CACCGTACATGCGGGCA<br>G    | ATGTGCTGGAGCTTCTC<br>CTGAGGGCAG  |
| 4794 | NFKBIE | IKBE                    | nuclear factor of kappa light polypeptide gene enhancer in B-cells inhibitor, epsilon | NM_004556 | ATGTGGAGGATGAGACGCC      | CACAGCAGCAGTTTCCC<br>TGAG | TCCCTTGTCTTTTGCCC<br>TTTGATGACC  |
| 4842 | NOS1   | NOS                     | nitric oxide synthase 1 (neuronal)                                                    | NM_000620 | GAAGCTCTCGGCAGAGGACG     | CTTCGTACGTTTCGCAGG<br>GTG | GCGTATTCATCAGCCGG<br>ATGAGGGATG  |
| 4843 | NOS2A  | NOS2                    | nitric oxide synthase 2A (inducible, hepatocytes)                                     | NM_000625 | TGGCTGCCAAGCTGAAATG      | ACCCTGTCTTCTTCGC<br>CTC   | GCTCAAGAGCCAGAAGC<br>GCTATCACGA  |
| 4844 | NOS2B  |                         | nitric oxide synthase 2B                                                              | U18332    | CAGCGGCTTCCGGCTC         | ACTGAGGAAGGGAGCGA<br>TGC  | GACCCCTCCATCCTCG<br>TGTCCTCATC   |
| 4845 | NOS2C  |                         | nitric oxide synthase 2C                                                              | U18334    | ATCCTCGCATCCTTGTCAGG     | CTTCCGCTGGGAGTCAT<br>GG   | CTCCCTTCCACAGTTTCT<br>GGCAGCAGC  |
| 4846 | NOS3   | eNOS, ECNOS             | nitric oxide synthase 3 (endothelial cell)                                            | NM_000603 | GGATCAGCAACGCTACCACG     | CCGCAACTGACGCTCCT<br>G    | CGCATACGCACCCAGAG<br>CTTTTCTTG   |
| 4858 | NOVA2  | ANOVA, NOVA3            | neuro-oncological ventral antigen 2                                                   | NM_002516 | AGTACCAGGAGCTGACGGC      | CGTAGGTGACCCGCTGA<br>CTG  | GATCTCCAAGAAGGGCG<br>AGTTCCTGCC  |



|       |       |                                                 |                                                     |                         |                              |                              |                                    |
|-------|-------|-------------------------------------------------|-----------------------------------------------------|-------------------------|------------------------------|------------------------------|------------------------------------|
| 4864  | NPC1  | NPC                                             | Niemann-Pick disease, type C1                       | NM_000271               | TTGGCCATGGTCTTACT<br>GGG     | GTTTCGCGCTCTGTTCCCTT<br>TG   | GCCAAAAGTTGTGCCAC<br>TGAAGAGCGA    |
| 7376  | NR1H2 | NER, UNR, LXR-B, NER-I, RIP15                   | nuclear receptor subfamily 1, group H, member 2     | NM_007121               | CCTACACGCGCATCAAG<br>AGG     | AGAGGCGGCAGCTTCTT<br>GTC     | TGAGCTCTGTGCACTCG<br>GAGCAGGTCT    |
| 10062 | NR1H3 | LXRA, LXR-A, RLD-1                              | nuclear receptor subfamily 1, group H, member 3     | NM_005693               | GACCGACTGATGTTCCC<br>ACG     | TTTGTCTGCAGACGCA<br>GTG      | AATGAAACTGGTGAGCC<br>TCCGGACCCT    |
| 2908  | NR3C1 | GR, GCR, GRL                                    | nuclear receptor subfamily 3, group C, member 1     | NM_000176               | TGGATTCTATGCATGAA<br>GTGGTTG | TGATTTTCAAGCTAACATCT<br>CGGG | TGCTTCCAAACATTTTTG<br>GATAAGACCA   |
| 3164  | NR4A1 | HMR, N10, TR3, NP10, GFRP1, NAK-1, NGFIB, NUR77 | nuclear receptor subfamily 4, group A, member 1     | NM_002135               | AGCTGTGGCGGGCGAG             | TGTC AATGATGGGTGGA<br>GGG    | TCTACCTCAAGCTGGAG<br>GACTTGGTGCC   |
| 4929  | NR4A2 | NOT, RNR1, HZF-3, NURR1, TINOR, TINUR           | nuclear receptor subfamily 4, group A, member 2     | NM_006186               | CCCAGAACTTCGTACCC<br>TTTGC   | TCAATTATTGCTGGCGG<br>TGG     | CAGGGGCTACAGCGCAT<br>TTTCTACCTGA   |
| 8013  | NR4A3 | CHN, CSMF, NOR1, MINOR                          | nuclear receptor subfamily 4, group A, member 3     | NM_006981               | GGAACCCAACGAGTCCA<br>AGG     | GTAGAAGATGCGCTGGA<br>GGC     | TCCTGGTTGCCCTGGTA<br>GAACTGAGGA    |
| 4914  | NTRK1 | MTC, TRK, TRKA                                  | neurotrophic tyrosine kinase, receptor, type 1      | NM_002529               | TCTCCAACACGGAGGCA<br>ATC     | CGCATGATGGCGTAGAC<br>CTC     | ACTGCATCACGCAGGGA<br>CGTGAGTTG     |
| 4915  | NTRK2 | TRKB                                            | neurotrophic tyrosine kinase, receptor, type 2      | NM_006180               | TATCACTCAGGGCCGAG<br>TCC     | GGCCAAGTTCTGAAGGA<br>GGG     | GTGTATGAGCTGATGCT<br>GGGGTGCTGG    |
| 4916  | NTRK3 | TRKC                                            | neurotrophic tyrosine kinase, receptor, type 3      | NM_002530               | TGAGTGCATTACCCAAG<br>GTCCG   | GATGTTCAACCGCTGCT<br>GTG     | GAGGTGTACGATGTCAT<br>GCTGGGGTGC    |
| 4938  | OAS1  | OIAS, IFI-4, OIASI                              | 2',5'-oligoadenylate synthetase 1 (40-46 kD)        | NM_002534,<br>NM_016816 | GAAGGCAGCTCACGAAA<br>CCC     | GGTAATTCAGCCAGGCC<br>TCAG    | CAGGAAACTTGGGTGGT<br>GGAGACCCAA    |
| 4939  | OAS2  | P69                                             | 2'-5'-oligoadenylate synthetase 2 (69-71 kD)        | NM_002535,<br>NM_016817 | GATCTTGGACCCAGGCG<br>AAC     | TTGGGTTTCCAGTCCCA<br>TCC     | CCGTTGGTGTGGCATC<br>TTCTGGACAA     |
| 8638  | OASL  | TRIP14                                          | 2'-5'-oligoadenylate synthetase-like                | NM_003733               | CCAACAGCTTCATCCTG<br>GGTC    | CTGCAGGACTTGGCCTT<br>GG      | CCAGCAGGGGCTTCCTA<br>AAAAGCAGCA    |
| 5081  | PAX7  | HUP1                                            | paired box gene 7                                   | NM_002584,<br>NM_013945 | CAGAGTGAGTGCCTGGT<br>GCC     | CACCCTGACACCACCTT<br>GTAGC   | CCCAGGGCCTCCTGCTT<br>GTTTATGGAG    |
| 5091  | PC    | PCB                                             | pyruvate carboxylase                                | NM_000920,<br>NM_022172 | ACATCAAAGTGGTGGCA<br>GGG     | TTGGTCACATGAACCTT<br>GCG     | CCCTGTGTGTGCTCAGT<br>GCCATGAAGA    |
| 5105  | PCK1  |                                                 | phosphoenolpyruvate carboxykinase 1 (soluble)       | NM_002591               | CAAGGAGGATGCCCTGA<br>ACC     | CGGCATTGACTTGATCC<br>ACC     | GAAAGGCCTGGGGCACA<br>TCAACATGAT    |
| 5106  | PCK2  | PEPCK                                           | phosphoenolpyruvate carboxykinase 2 (mitochondrial) | NM_004563               | AGGAGCCTTGATCTCA<br>GCG      | TCCGAATGTCACGAACC<br>TCC     | CTCCCTCCCCAAGGACT<br>TCTGGGAACA    |
| 5111  | PCNA  |                                                 | proliferating cell nuclear antigen                  | NM_002592               | CGGTGACACTCAGTATG<br>TCTGC   | CATCCTCGATCTTGGA<br>GCC      | CCCCTTGTTGTAGAGTAT<br>AAAATTGCGGA  |
| 5139  | PDE3A | CGI-PDE                                         | phosphodiesterase 3A, cGMP inhibited                | NM_000921               | TCAATCCCTGGACCAGA<br>CCC     | TGGGTTGGTATCTCCTC<br>GCC     | CAGTCGCACTCTTCAGA<br>ACAGATCCAGGC  |
| 5140  | PDE3B |                                                 | phosphodiesterase 3B, cGMP inhibited                | NM_000922               | CAGCTAATGCACCACCT<br>CACTG   | CCTGCAGTTTATTCCCAT<br>CAGC   | CCACAAGATATGGAAGG<br>AAATCGTAGAGGA |

|       |        |                                           |                                                                                      |                                                     |                                  |                            |                                   |
|-------|--------|-------------------------------------------|--------------------------------------------------------------------------------------|-----------------------------------------------------|----------------------------------|----------------------------|-----------------------------------|
| 5141  | PDE4A  | DPDE2                                     | phosphodiesterase 4A, cAMP-specific (phosphodiesterase E2 dunce homolog, Drosophila) | NM_006202                                           | TGCTTGGAGGACCCTGTCTG             | AGCCTGGTGCTCTCGTTGG        | TTTCAGAGCATGCCCGG<br>GGCCT        |
| 5142  | PDE4B  | DPDE4, PDEIVB                             | phosphodiesterase 4B, cAMP-specific (phosphodiesterase E4 dunce homolog, Drosophila) | NM_002600                                           | GCCAGGGTCTGATGGAG<br>AAG         | CAAAGCGTCTTTGTGCT<br>GCTG  | CCTGAGAAGGAGGGAGA<br>GGGACACAGC   |
| 5143  | PDE4C  | DPDE1                                     | phosphodiesterase 4C, cAMP-specific (phosphodiesterase E1 dunce homolog, Drosophila) | NM_000923                                           | ACGGGCCTGACAGATTC<br>CAG         | GGGACAGGAGTTCAGTG<br>TCAGG | CAGCTTTAGCCAAAGAG<br>GCCTTGGAGTTG |
| 5144  | PDE4D  | DPDE3                                     | phosphodiesterase 4D, cAMP-specific (phosphodiesterase E3 dunce homolog, Drosophila) | NM_006203                                           | CAGTGGCAGTCAAGTGG<br>AAGAAG      | CACAGGCTTCAGGCTGG<br>C     | AGCTGCAGTGACTION<br>GACTCTTTGT    |
| 8654  | PDE5A  | CN5A, PDE5, PDE5A1, CGB-PDE               | phosphodiesterase 5A, cGMP-specific                                                  | NM_001083,<br>NM_033430,<br>NM_033431,<br>NM_033437 | TGTATGAGGCCCTGACC<br>CAC         | CAAGGGCCTGCCATTT<br>TG     | GGACTGTTTCCCTTTGCT<br>AGATGGCTGCA |
| 5150  | PDE7A  | HCP1                                      | phosphodiesterase 7A                                                                 | L12052                                              | ACAATGCTTGGACACGT<br>GGG         | TGCAGCATCAGTGTCT<br>CAC    | GCCAGCTGGAAGGGACT<br>GCAGAGAGAA   |
| 27115 | PDE7B  |                                           | phosphodiesterase 7B                                                                 | NM_018945                                           | GCCCATTTACGGGTAA<br>CAG          | AACAGGCTCTTCCACTG<br>GGC   | GTCGGAGAACATGCTGG<br>GCCACCTC     |
| 5160  | PDHA1  | PDHA, PHE1A                               | pyruvate dehydrogenase (lipoamide) alpha 1                                           | NM_000284                                           | GGAGATTGAGGATGCTG<br>CCC         | ATCCACTGATTGGCACC<br>ACG   | TGAGCCACCTTTGGAAG<br>AGCTGGGCTA   |
| 5166  | PDK4   |                                           | pyruvate dehydrogenase kinase, isoenzyme 4                                           | NM_002612                                           | AGTCAGCCTTCAAACATT<br>ATCAGATGAG | TGCCAGGTTCTTTGGTTC<br>CC   | TGAGGCTGATGACTGGT<br>GTATCCAAGCA  |
| 8682  | PEA15  | PED, MAT1, HMAT1, MAT1H, PEA-15, HUMMAT1H | phosphoprotein enriched in astrocytes 15                                             | NM_003768                                           | ATCTTTGAGATCTCCCG<br>CCG         | TGGTGTCCAGCTCATCC<br>TCC   | TGGTGGTTGACTACAGA<br>ACCCGTGTGC   |
| 5196  | PF4    | SCYB4                                     | platelet factor 4                                                                    | NM_002619                                           | ACCTGCAGTGCCTGTGT<br>GTG         | CAGCGTGGCTATCAGTT<br>GGG   | GCACATCACCAGCCTGG<br>AGGTGATCAA   |
| 5211  | PFKL   |                                           | phosphofructokinase, liver                                                           | NM_002626                                           | AGATGCTGGCACAATAC<br>CGC         | CCTTGTCCATGCTCAGG<br>GTG   | ATCAGTATGGCCGCCTA<br>CGTGTCAGGG   |
| 5213  | PFKM   |                                           | phosphofructokinase, muscle                                                          | NM_000289                                           | CCAAGGAACAGTGGTGG<br>CTG         | GGTGGGCATGGTCTGAA<br>GTG   | TGAGGCCCATCCTCAA<br>ATCCTAGCCA    |
| 5295  | PIK3R1 | GRB1                                      | phosphoinositide-3-kinase, regulatory subunit, polypeptide 1 (p85 alpha)             | M61906                                              | CAGAGTACTTGCTGTTA<br>GCCCAAGG    | GCAGCTTTGAAGCTTAT<br>CAGGC | TTTTTGGACTGTTTTGTT<br>GGCAGT      |

|       |         |                                       |                                                                   |                                                                                                                                                       |                            |                                 |                                  |
|-------|---------|---------------------------------------|-------------------------------------------------------------------|-------------------------------------------------------------------------------------------------------------------------------------------------------|----------------------------|---------------------------------|----------------------------------|
| 5313  | PKLR    | PK1                                   | pyruvate kinase, liver and RBC                                    | NM_000298                                                                                                                                             | ACCGTGAACCTCCAGAA<br>GCC   | GCCAGCCTGTCACCACA<br>ATC        | ATCTGGGCAGATGATGT<br>AGATCGCCGG  |
| 5315  | PKM2    | PK3, OIP3, THBP1                      | pyruvate kinase, muscle                                           | NM_002654                                                                                                                                             | GTGGCATCTTCCCTGTG<br>CTG   | TTCATGGCAAAGTTCAC<br>CCG        | AGTCCAGGAGGCCTGG<br>GCTGAGGAC    |
| 30814 | PLA2G2E |                                       | phospholipase A2, group IIE                                       | NM_014589                                                                                                                                             | GGCTGACCTGCGAGTGT<br>GAC   | AATGGGCATATTTGCGG<br>TTG        | CTCTGCTTTTCGCCGCAA<br>CCTGGG     |
| 5321  | PLA2G4A | PLA2G4, CPLA2-ALPHA                   | phospholipase A2, group IVA (cytosolic, calcium-dependent)        | M68874                                                                                                                                                | TCCATCTCGTTGCTCTGT<br>TTCC | GCTTTGGGTTTACTTAGA<br>AACTCCTTG | TAATGTTGAGGCAAGAA<br>GATTTTTCAA  |
| 8681  | PLA2G4B | CPLA2-BETA                            | phospholipase A2, group IVB (cytosolic)                           | NM_005090                                                                                                                                             | CACGAAGGTGACCTACA<br>GCCAG | GCTGCTCCTGTTGTTG<br>CAG         | TGGACAAGCTGCTGCAC<br>CTGACACATT  |
| 8605  | PLA2G4C | CPLA2-GAMMA                           | phospholipase A2, group IVC (cytosolic, calcium-independent)      | NM_003706                                                                                                                                             | TGTGGTGGTGCTACTCT<br>TGCC  | CTTCGGGCACTATCCTT<br>CGG        | TTAGAGAGTTGATGAAC<br>GTGGCCGGGC  |
| 8398  | PLA2G6  | IPLA2                                 | phospholipase A2, group VI (cytosolic, calcium-independent)       | NM_003560                                                                                                                                             | ACACAGTGCTGGTCAAC<br>GCC   | GCAGCAGGTGGATGAGC<br>TTC        | CATCTATGAGCACCGCG<br>AGGAGTTCCA  |
| 5327  | PLAT    | TPA, T-PA                             | plasminogen activator, tissue                                     | NM_000930,<br>NM_000931,<br>NM_033011                                                                                                                 | CTTTGGTGGGCATCATC<br>AGC   | TCACGGTCCGATGTTGT<br>CAC        | AGGATGTCCCGGGTGTG<br>TACACCAAGG  |
| 5328  | PLAU    | URK                                   | plasminogen activator, urokinase                                  | NM_002658                                                                                                                                             | CAAGGCCGCATGACTTT<br>GAC   | CTTCCTTGGTGTGACTG<br>CGG        | TGAAGGACAAGCCAGGC<br>GTCTACACGA  |
| 5340  | PLG     |                                       | plasminogen                                                       | NM_000301                                                                                                                                             | TTGCCAGGGTGACAGTG<br>GAG   | CGTGACAGCCAAGACC<br>C           | TCCTCTGGTTTGCTTCGA<br>GAAGGACAA  |
| 5350  | PLN     | PLB                                   | phospholamban                                                     | NM_002667                                                                                                                                             | GCCTCAACCATTGAAAT<br>GCC   | CGATGATACAGATCAGC<br>AAGAGAC    | TCAACAAGCACGTCAAA<br>AGCTACAGAA  |
| 5360  | PLTP    |                                       | phospholipid transfer protein                                     | NM_006227                                                                                                                                             | GAGGTGGTGACGAACCA<br>TGC   | CTCAATCACCTCTCGCA<br>GCC        | CTCACCATCGGGGCTGA<br>TCTCCACTTT  |
| 5371  | PML     | MYL, TRIM19                           | promyelocytic leukemia                                            | NM_002675,<br>NM_033238,<br>NM_033239,<br>NM_033240,<br>NM_033242,<br>NM_033244,<br>NM_033245,<br>NM_033246,<br>NM_033247,<br>NM_033249,<br>NM_033250 | TGGCTTCGACGAGTTCA<br>AGG   | TAGGGTCCCTGGGAGTG<br>CTG        | GCAGCTGTATCCAAGAA<br>AGCCAGCCCA  |
| 5468  | PPARG   | HUMPPARG,<br>NR1C3, PPARG1,<br>PPARG2 | peroxisome proliferative activated receptor, gamma                | NM_005037,<br>NM_015869                                                                                                                               | GCTGAAGCTGAACCACC<br>CTG   | GCAGGAGCGGGTGAAG<br>ACTC        | TCCTCACAGCTGTTTGC<br>CAAGCTGCTC  |
| 10891 | PPARGC1 | PGC1                                  | peroxisome proliferative activated receptor, gamma, coactivator 1 | NM_013261                                                                                                                                             | TTGACCCTGCTTCCACC<br>AAG   | CTGCGCAAGCTTCTCTG<br>AGC        | AGCAAGTATGACTCTCT<br>GGATTTTGTAT |

|       |          |                                |                                                                                                     |           |                         |                           |                               |
|-------|----------|--------------------------------|-----------------------------------------------------------------------------------------------------|-----------|-------------------------|---------------------------|-------------------------------|
| 5501  | PPP1CC   |                                | protein phosphatase 1, catalytic subunit, gamma isoform                                             | NM_002710 | TGCAGGTGCCATGATGATG     | TGGAGGCGTTACAGGTC TCG     | GCCTGCAGAGAAAAAGA AGCCAAATGCC |
| 23645 | PPP1R15A | GADD34                         | protein phosphatase 1, regulatory (inhibitor) subunit 15A                                           | NM_014330 | GGAGCAGCTTGCTCGGG       | TTCTGAGGCGTGCCC           | AGGAGGAGCTGAGCCC CTGCCTCAC    |
| 5530  | PPP3CA   | CALN, CCN1, CNA1, CALNA, PPP2B | protein phosphatase 3 (formerly 2B), catalytic subunit, alpha isoform (calcineurin A alpha)         | NM_000944 | GCTTCGAGGAAGCCAAG GG    | TAAGGTTGGCGTCAGAG GGC     | TTAATGAGAGGATGCCG CCTCGCAGAG  |
| 5532  | PPP3CB   | CALNB                          | protein phosphatase 3 (formerly 2B), catalytic subunit, beta isoform (calcineurin A beta)           | NM_021132 | GAATGCCACCTCGGAAA GATG  | CACTGGGCAGTATGGTT GCC     | TCAATTCTCTGAACACCG CACATGCCA  |
| 5553  | PRG2     | MBP, BMPG                      | proteoglycan 2, bone marrow (natural killer cell activator, eosinophil granule major basic protein) | NM_002728 | TGGATTGGAGGCAGGAT CAC   | CTGGTGAGCAGCCCAGT ACG     | GTCGCTGCAGACGCTTT CAGTGGGTT   |
| 5563  | PRKAA2   | AMPK, PRKAA                    | protein kinase, AMP-activated, alpha 2 catalytic subunit                                            | NM_006252 | GTTCTGTTCTGCTGCT GGC    | TGTGCTTCCGGTCAAAG AGC     | TGCAGAGAGCCATTCAC TTTCTGGCTC  |
| 5564  | PRKAB1   |                                | protein kinase, AMP-activated, beta 1 non-catalytic subunit                                         | NM_006253 | TGCTTCCTGAGCCCAAT CAC   | TTCTTGACCGGTGGGT TGC      | TCATGCTGAACCACCTAT ACGCGCTGTC |
| 5566  | PRKACA   |                                | protein kinase, cAMP-dependent, catalytic, alpha                                                    | NM_002730 | TGGTTTGCCACA ACTGA CTGG | TGGAGACCCGGATTCT TCTTC    | ACCAGAGGAAGGTGGAA GCTCCCTTCA  |
| 5567  | PRKACB   |                                | protein kinase, cAMP-dependent, catalytic, beta                                                     | NM_002731 | GCCACGACAGATTGGAT TGC   | CAAAGTTGCTGGTATCT CCAGAGC | ACCAGAGGAAGGTTGAA GCTCCATTCA  |
| 5568  | PRKACG   | KAPG                           | protein kinase, cAMP-dependent, catalytic, gamma                                                    | NM_002732 | GTGGAAGCTCCCTTCAT CCC   | CCGGAGCTCTCCTCCT CG       | GGCCCTGGGGATGCCA GTAACCTTGAC  |
| 5571  | PRKAG1   |                                | protein kinase, AMP-activated, gamma 1 non-catalytic subunit                                        | NM_002733 | GTGGAAGCAGAGGTTCA CCG   | TTCTCTCCACCTGTGAG CACC    | ATCACTGTCTGACATCCT GCAGGCCCT  |
| 5573  | PRKAR1A  | CAR, CNC1, TSE1, PRKAR1        | protein kinase, cAMP-dependent, regulatory, type I, alpha (tissue specific extinguisher 1)          | NM_002734 | ATGAATCGTCCTCGTGC TGC   | TCTGAGCATGGCCAAG AAC      | AGTTGTTGCTCGTGCC CCTTGAAGTG   |
| 5578  | PRKCA    | PKCA                           | protein kinase C, alpha                                                                             | NM_002737 | GGGAGATCCAGCCACCA TTC   | TAAGACGGGCTGTCCTC GTG     | AGCCCAAAGTGTGTGGC AAAGGAGCAG  |
| 5579  | PRKCB1   | PKCB, PRKCB, PRKCB2            | protein kinase C, beta 1                                                                            | NM_002738 | GAACGCAAAGAGATCCA GCC   | TCCACAGGCTGTCTGGT GAAC    | CAAGAGAGACACCTCCA ACTTCGACAA  |
| 5581  | PRKCE    | PKCE                           | protein kinase C, epsilon                                                                           | NM_005400 | AAGCCACCTTCAAACC ACG    | GTGAGTACCGCTCTTC CCG      | CCAAAAGAGACGTCAAT AATTTTGACCA |

|       |       |                                                        |                                                                                                |           |                               |                               |                                  |
|-------|-------|--------------------------------------------------------|------------------------------------------------------------------------------------------------|-----------|-------------------------------|-------------------------------|----------------------------------|
| 5582  | PRKCG | PKCC, PKCG                                             | protein kinase C, gamma                                                                        | NM_002739 | GCGGCGAGAACTTTGAC<br>AAG      | AGGTGAAGCCCTGGAAA<br>TCG      | CTGACCCCTCCAGACCG<br>CCTAGTCCTG  |
| 5592  | PRKG1 | PGK, PRKG1B,<br>PRKGR1B                                | protein kinase, cGMP-<br>dependent, type I                                                     | NM_006258 | AAGCACAAATGGTTTGA<br>GGGC     | GGTTCATCGTTGTCCTC<br>AGGG     | CCAAGTGTTCATCACC<br>CACAGACACA   |
| 5610  | PRKR  | PKR, EIF2AK1                                           | protein kinase, interferon-<br>inducible double stranded<br>RNA dependent                      | NM_002759 | TTTCACAGACCTACGGG<br>ATG      | GGTCGATCCTCAGGTTT<br>CTTTG    | GCATCATCTCAGATATAT<br>TTGATAAAAA |
| 11168 | PSIP2 | P75, LEDGF                                             | PC4 and SFRS1 interacting<br>protein 2                                                         | NM_033222 | CAGGGTCAAAGACTCTA<br>AATGGAGG | TGGCTTCATGGTTGTCTT<br>TGC     | TCAGCCACAACATAACG<br>GGGAGAGCAA  |
| 5728  | PTEN  | BZS, MHAM, TEP1,<br>MMAC1                              | phosphatase and tensin<br>homolog (mutated in multiple<br>advanced cancers 1)                  | NM_000314 | AGAGGAGCCGTCAAATC<br>CAG      | TCATTCTCTGGATCAGA<br>GTCAGTGG | GGCTAGCAGTTCAAATT<br>CTGTAACACCA |
| 5742  | PTGS1 | COX1, PHS,<br>PTGHS, PGG/HS,<br>PGHS-1                 | prostaglandin-endoperoxide<br>synthase 1 (prostaglandin<br>G/H synthase and<br>cyclooxygenase) | NM_000962 | CGGAGTACTGGAAGCCG<br>AGC      | CAGGCCCATCATCCTGA<br>CTG      | GGCCACACTGAAGAAGC<br>TGGTCTGCCT  |
| 5743  | PTGS2 | COX2, COX-2, PHS-<br>2, PGG/HS, PGHS-<br>2, hCox-2     | prostaglandin-endoperoxide<br>synthase 2 (prostaglandin<br>G/H synthase and<br>cyclooxygenase) | NM_000963 | CATCTGCAATAACGTGA<br>AGGGC    | ATCATCTAGTCCGGAGC<br>GGG      | TCATTCAAGTGTCCAGAT<br>CCAGAGCTCA |
| 5747  | PTK2  | FAK, FADK,<br>pp125FAK                                 | PTK2 protein tyrosine kinase<br>2                                                              | NM_005607 | CATGACCAGCCTCCAGC<br>AAG      | CAGTGTGGTCTCGTCTG<br>CCC      | CAAAAAGCAAATGCTGA<br>CTGCCGCTCA  |
| 2185  | PTK2B | PKB, PTK, CAKB,<br>FAK2, PYK2,<br>CADTK, RAFTK,<br>CAK | protein tyrosine kinase 2 beta                                                                 | NM_004103 | GTCATCAACAAGATGC<br>GGC       | AGAACCTTGGCCTGGTC<br>CAC      | CGTGACCTCCCTGAGTG<br>AGGAGTGCAA  |
| 5770  | PTPN1 | PTP1B, PTP-1B                                          | protein tyrosine phosphatase,<br>non-receptor type 1                                           | NM_002827 | AAGTCTTCGAGGTGCC<br>AGG       | TCAGTGCATGGTCCTCG<br>TCC      | CTGCCTCCCCAGCCAAA<br>GGGGAG      |
| 5788  | PTPRC | LCA, LY5, CD45,<br>T200, GP180                         | protein tyrosine phosphatase,<br>receptor type, C                                              | NM_002838 | TGTGTTAATCCACTTGGT<br>GCCC    | AGTGCCACTCGTGGGTT<br>CAG      | GCTCCCTGAAGCAAAGG<br>AACAGGCTGA  |
| 5834  | PYGB  |                                                        | phosphorylase, glycogen;<br>brain                                                              | NM_002862 | GACCAGCTGTACCGGAA<br>CCC      | GCATACTCCGTGATGGT<br>CCG      | AAGGTCATCAGGAACAT<br>CGCCTGCTCG  |
| 5836  | PYGL  |                                                        | phosphorylase, glycogen;<br>liver (Hers disease, glycogen<br>storage disease type VI)          | NM_002863 | AAAGGCCTGGAACACAA<br>TGG      | TGAAGGTTCCACGTTCC<br>AGATG    | CGGGGAAATTCTCCAGT<br>GACCGAACAA  |
| 5837  | PYGM  |                                                        | phosphorylase, glycogen;<br>muscle (McArdle syndrome,<br>glycogen storage disease<br>type V)   | NM_005609 | AAGAGAGTGGACGCGGA<br>TGG      | AGATCTCCCGGCATAC<br>TGG       | CAAGTTCTCCAGTGACC<br>GCACCATTGC  |
| 5864  | RAB3A |                                                        | RAB3A, member RAS<br>oncogene family                                                           | NM_002866 | AGTTCTTTGAGGCAAGC<br>GCC      | CGACTCGGACATCTTCT<br>CGC      | ACCTTTGAGCGCCTGGT<br>GGATGTCATC  |

|       |         |                                                 |                                                                                                                                         |           |                            |                          |                               |
|-------|---------|-------------------------------------------------|-----------------------------------------------------------------------------------------------------------------------------------------|-----------|----------------------------|--------------------------|-------------------------------|
| 10527 | RANBP7  |                                                 | RAN binding protein 7                                                                                                                   | NM_006391 | TCAGGCACTGACTCAGGTC        | TTGGCACAACCTGGAGCACTG    | TGGCTGATCAAAGAAGAGCAGCCCATG   |
| 5966  | REL     | I-Rel                                           | v-rel reticuloendotheliosis viral oncogene homolog (avian)                                                                              | NM_002908 | TGAGTCGGGACCATCAACAG       | TTTGCATACTGCCAATACCTG    | TCCAAACAGTCATGGTTTGTTC AAGA   |
| 5970  | RELA    | NFKB3                                           | v-rel reticuloendotheliosis viral oncogene homolog A, nuclear factor of kappa light polypeptide gene enhancer in B-cells 3, p65 (avian) | NM_021975 | CTGAGCCCATGCTGATGGAG       | AGTGGAGCAGGAGCTGGGTC     | AACTCGCCTAGTGACAGCCCAGAGGCC   |
| 5971  | RELB    | I-REL                                           | v-rel reticuloendotheliosis viral oncogene homolog B, nuclear factor of kappa light polypeptide gene enhancer in B-cells 3 (avian)      | NM_006509 | CCCTGAACCACTGACACTGGAC     | ACATGTTGCTGCCCACAGG      | GGGGATGGAGGCACCGCCAG          |
| 5972  | REN     |                                                 | renin                                                                                                                                   | NM_000537 | GTGCACACTGGCCATCCAC        | AAGCCAATGCGGTTGTTACG     | GGGGGCCACCTTCATCCGAAAGTTCTA   |
| 56729 | RETN    | FIZZ3, RSTN                                     | resistin; found in inflammatory zone 3                                                                                                  | NM_020415 | TAAGCAGCATTGGCCTGGAG       | AGTGACATGTGGTCTCGGCG     | ACCTGGCTACTTGCCCCCGAGGCTT     |
| 5996  | RGS1    | BL34, IER1, IR20                                | regulator of G-protein signalling 1                                                                                                     | NM_002922 | TCCGCACTCGAGAATCTACAGC     | TTGAGGAACCTGGGATAAGAGTCC | AAGCACCAACCCCCACGTGTTTTGATG   |
| 5997  | RGS2    | GOS8                                            | regulator of G-protein signalling 2, 24kD                                                                                               | NM_002923 | TGGAGAACAACCTTTATCTCGTTTTC | GAGGCTCTGTGGTGATTGTGG    | TGGAGTCAGAATTCTAC CAGGACTTGTG |
| 5999  | RGS4    |                                                 | regulator of G-protein signalling 4                                                                                                     | NM_005613 | ATTTGGTCAACCCGTCCAGC       | AGGCACACTGAGGGACAGG      | GGGGCAGAAAAGCAGAAAGGAGCCAAG   |
| 6041  | RNASEL  | HPC1, RNS4, PRCA1                               | ribonuclease L (2',5'-oligoadenylate synthetase-dependent)                                                                              | NM_021133 | AAATTGGAGACCCTTCCCTG       | CCAGCTCCATCACACTGAGG     | TTCCCCCAAACCCACAGTCCAAACAAA   |
| 6093  | ROCK1   | P160ROCK                                        | Rho-associated, coiled-coil containing protein kinase 1                                                                                 | NM_005406 | TGCTGCTGTTAGCATGTTCTC      | CCGGAAGACTGATTTGCAGTG    | GTTCTGCTTCCCCTCGAACGCTTCT     |
| 9475  | ROCK2   | KIAA0619                                        | Rho-associated, coiled-coil containing protein kinase 2                                                                                 | NM_004850 | GCAGAAGTGGGTTAGTCGGTTG     | AGCTGTGCACTTGCCCGTC      | GCTCCAGACCCTTTTGC CCGATCATCT  |
| 6195  | RPS6KA1 | RSK, HU-1, RSK1, MAPKAPK1A                      | ribosomal protein S6 kinase, 90kD, polypeptide 1                                                                                        | NM_002953 | CTGCCACGTACTCCGCACTC       | TGGTGGATGGCAACTTCTC      | CCAGCTGAAGCCCATCGAGTCATCCAT   |
| 6196  | RPS6KA2 | RSK, HU-2, RSK3, MAPKAPK1C                      | ribosomal protein S6 kinase, 90kD, polypeptide 2                                                                                        | NM_021135 | CAAACCAGCTCAGCCGACAG       | GCCAGGTTGGATGACAGCAC     | CGATGGCCGCCACCTACTTTGCTCTAA   |
| 6197  | RPS6KA3 | RSK, HU-2, HU-3, RSK2, MRX19, ISPK-1, MAPKAPK1B | ribosomal protein S6 kinase, 90kD, polypeptide 3                                                                                        | NM_004586 | GGGACCAACTGCCACAACTACC     | GCTGAGCAAGAGTAGAGCGGC    | GGGTGCCATGGCAGCTACATATTCTGC   |
| 8986  | RPS6KA4 | MSK2, RSKB, RSK-B                               | ribosomal protein S6 kinase, 90kD, polypeptide 4                                                                                        | NM_003942 | TGGCATTCAACCGGG            | AGCTTCTGCTTCCGCCG        | CAAGCGGGAGGGCTTCTTCCTGAAGAG   |

|       |         |                                                                   |                                                                                           |           |                       |                       |                                  |
|-------|---------|-------------------------------------------------------------------|-------------------------------------------------------------------------------------------|-----------|-----------------------|-----------------------|----------------------------------|
| 9252  | RPS6KA5 | MSK1, RLPK, MSPK1                                                 | ribosomal protein S6 kinase, 90kD, polypeptide 5                                          | NM_004755 | CAGTACCGAGACGCGCAGAG  | GATTGCTGGGCTGCAGTGTC  | TCCATTCTTCTTCCTCTCATTCTCACGG     |
| 27330 | RPS6KA6 | RSK4                                                              | ribosomal protein S6 kinase, 90kD, polypeptide 6                                          | NM_014496 | TTGCCAAATGATCAGCCAAAG | TGGGCTAAGCTTGAAGCAGC  | GGAGCAATGGTTGCAACATACTCTGCCC     |
| 6236  | RRAD    | RAD1                                                              | Ras-related associated with diabetes                                                      | NM_004165 | CAAAGAAGCCAACGCACGAC  | GTTACGAGCTACGATGCGGC  | CGAGAGAGCCTTGGCAA<br>AAAGGCGAAG  |
| 57142 | RTN4    | ASY, NOGO, NSP-CL, KIAA0886                                       | reticulon 4                                                                               | NM_007008 | ATGAACGGCATCAGGCCAG   | TCAGCTTTGCGCTTCAATCC  | TGCTATGGCTAAAATCCAGCAAAAATCCC    |
| 860   | RUNX2   | CCD, AML3, CCD1, OSF2, CBFA1, PEBP2A1, PEBP2A2, PEBP2aA, PEBP2aA1 | runt-related transcription factor 2                                                       | NM_004348 | ATGCACCACCACCTCGAATG  | GGTCGCCAAACAGATTCATCC | GATGGTGTGACGCTGATGGAAGCCAC       |
| 6261  | RYR1    | CCO, MHS, RYR, MHS1                                               | ryanodine receptor 1 (skeletal)                                                           | NM_000540 | ACACGCTGGAGGAGCACAAC  | ACCAGCTGGGAAGAAATCCC  | GGATGAGACAGAACACACCGGGTCAGGA     |
| 6288  | SAA1    | SAA                                                               | serum amyloid A1                                                                          | NM_000331 | GAGATTCTTTGGCCATGTGC  | AGCAGGTCGGAAGTGATGCG  | CAATGAATGGGGCAGGAGTGGCAAAGA      |
| 22937 | SCAP    | KIAA0199                                                          | SREBP Chaperone                                                                           | D83782    | GGCCAGGGCTGTGTCTCC    | AGTTGCAGACAATGGCAGCG  | TACCTGGGGAAGAACAGTGAGGCCAG       |
| 8578  | SCARF1  | SREC, KIAA0149                                                    | acetyl LDL receptor; SREC=scavenger receptor expressed by endothelial cells               | NM_003693 | GGGCCTATGGCAGTCAGACC  | GCCTTTCCTCTTCAGCCTGC  | AAGGAGAGCCCAGGAGCCAGTCTCTGG      |
| 6319  | SCD     |                                                                   | stearoyl-CoA desaturase (delta-9-desaturase)                                              | NM_005063 | ACCGCTGGCACATCAACTTC  | GGCGGCCTTGGAGACTTTC   | ATTCTTCATTGATTGGATGGCCGCCCT      |
| 6361  | SCYA17  | TARC                                                              | small inducible cytokine subfamily A (Cys-Cys), member 17                                 | NM_002987 | ACTTCAAGGGAGCCATCCC   | GTCCGAACAGATGGCCCTG   | ACATCTGAGGACTGCTCAGGGATGCC       |
| 6347  | SCYA2   | MCP1                                                              | small inducible cytokine A2 (monocyte chemotactic protein 1)                              | NM_002982 | CAAGACCATTGTGGCCAGG   | TGGGTTTGCTTGTCCAGGTG  | GCTGACCCCAAGCAGAA<br>GTGGGTTCCAG |
| 6367  | SCYA22  | MDC, STCP-1                                                       | small inducible cytokine subfamily A (Cys-Cys), member 22                                 | NM_002990 | TACGTCCGTTACCGTCTGCC  | GGTTAGCAACACCACGTCAG  | TACTGGACCTCAGACTCTGCCCCGAGG      |
| 6352  | SCYA5   | CCL5, RANTES, TCP228, D17S136E                                    | small inducible cytokine A5 (RANTES)                                                      | NM_002985 | ATTCCTCGGACACCACACCC  | CACACTTGCGGTTCTTTCG   | GCCCCGTGCCACATCAAGGAGTATTT       |
| 6355  | SCYA8   | MCP-2                                                             | small inducible cytokine subfamily A (Cys-Cys), member 8 (monocyte chemotactic protein 2) | NM_005623 | CATCCAATGTCCCAAGGAAGC | CATGGAATCCCTGACCCATC  | ATCTTCAAGACCCAACGGGCAAGGAG       |

|       |          |                                            |                                                                                                              |           |                         |                        |                                 |
|-------|----------|--------------------------------------------|--------------------------------------------------------------------------------------------------------------|-----------|-------------------------|------------------------|---------------------------------|
| 3627  | SCYB10   | IFI10, INP10, IP-10                        | small inducible cytokine subfamily B (Cys-X-Cys), member 10                                                  | NM_001565 | TTGTCCACGTGTTGAGATCATTG | TTGATGGCCTTCGATTCTGG   | TGAAAAAGAAGGGTGAG AAGAGATGTCTGA |
| 6376  | SCYD1    | NTN, NTT, CX3CL1, CX3CR1, C3XKINE, C3Xkine | small inducible cytokine subfamily D (Cys-X3-Cys), member 1 (fractalkine, neurotactin)                       | NM_002996 | TTCTTGGCCTCCTCTTCG      | CTCCTGCCATCTTTCGAGGG   | GGCCATGTTACCTACC AGAGCCTCCA     |
| 6401  | SELE     | ELAM, ESEL, CD62E, ELAM1, LECAM2           | selectin E (endothelial adhesion molecule 1)                                                                 | NM_000450 | GCTGGACTTTCTGCTGCTGG    | TGATTCAAGGCTTTGGCAGC   | TGGCTTCGGAAATGCTTACGGAAAGCA     |
| 5104  | SERPINA5 | PCI, PAI3, PROCI, PLANH3                   | serine (or cysteine) proteinase inhibitor, clade A (alpha-1 antiproteinase, antitrypsin), member 5           | NM_000624 | CAAAGCTGTGGTGGAGGTGG    | CCTCTGAGAGTTCAGGCGGG   | CGGCAGCCACGGGGACAATATTCACTT     |
| 5054  | SERPINE1 | PAI, PAI1, PAI-1, PLANH1                   | serine (or cysteine) proteinase inhibitor, clade E (nexin, plasminogen activator inhibitor type 1), member 1 | NM_000602 | TCGAGGTGAACGAGAGTGGC    | CGGACCACAAAGAGGAAAGGG  | CAGCTGTCATAGTCTCA GCCCGCATGG    |
| 5270  | SERPINE2 | GDN, PI7, PN1, PNI                         | serine (or cysteine) proteinase inhibitor, clade E (nexin, plasminogen activator inhibitor type 1), member 2 | A03911    | AAGATCATCGCCTCCCTGG     | CCCATGAATAACACAGCACCTG | CAGACCTTTTCTGTTTTT CATCCGACA    |
| 6446  | SGK      |                                            | serum/glucocorticoid regulated kinase                                                                        | NM_005627 | GAGTGGGCCCAACGAGCTAC    | CTTCCTTGACGCTGGCTGTG   | AGCCTGTCCCCAACTCC ATTGGCAAGT    |
| 6554  | SLC10A1  | NTCP, NTCP1                                | solute carrier family 10 (sodium/bile acid cotransporter family), member 1                                   | NM_003049 | AAGGGCTTCTCCTCATTGCC    | TCCCAGAGCTCCTGGAAATG   | TGATCTACACAGCTGCC ACAACTGAAGA   |
| 6555  | SLC10A2  | ASBT, ISBT, NTCP2                          | solute carrier family 10 (sodium/bile acid cotransporter family), member 2                                   | NM_000452 | CCTTCCCCTCATCTACAGC     | CGATGACTCTGGCTCCGTTC   | CCAGCTCGCCTTTGCCG CAATATTCTT    |
| 6506  | SLC1A2   | EAAT2, GLT-1                               | solute carrier family 1 (glial high affinity glutamate transporter), member 2                                | NM_004171 | CATGAAGAACCACAGGGAAGC   | TCCTCAACTGCAGTCGGC     | TGCAAGGTAACCTCTGGCAGCCAATGGA    |
| 6507  | SLC1A3   | EAAT1, GLAST                               | solute carrier family 1 (glial high affinity glutamate transporter), member 3                                | NM_004172 | TGGGATTGTGGAGCACTTGTC   | TTGGTTTTCACTGTGATGG    | TCAACTGATTGCACAGGACAATGAACTGA   |
| 28232 | SLC21A11 | OATP-D                                     | solute carrier family 21 (organic anion transporter), member 11                                              | NM_013272 | GGGCTGAGCACCAGTAGTTC    | TCCTATGTGTCTGGTTTGGC   | TGACCCTAGACAACCTGGGAGGGACC      |



|       |          |                                                          |                                                                            |                         |                                |                              |                                  |
|-------|----------|----------------------------------------------------------|----------------------------------------------------------------------------|-------------------------|--------------------------------|------------------------------|----------------------------------|
| 53919 | SLC21A14 | OATP-F                                                   | solute carrier family 21 (organic anion transporter), member 14            | NM_017435               | AAGAACAATGGTGTCTA<br>CAAGATTCC | CCTTGCCTGGCCAGTAG<br>TTG     | CACTACAAGTGATCATCT<br>GCTACAACC  |
| 6578  | SLC21A2  | PGT                                                      | solute carrier family 21 (prostaglandin transporter), member 2             | NM_005630               | GGTGGAACTCGCTGTGC<br>TTG       | CTTGTAGCCCATCTGCA<br>GGC     | GGCCTGCGCCTACTAT<br>GACAACGATG   |
| 6579  | SLC21A3  | OATP, OATP-A                                             | solute carrier family 21 (organic anion transporter), member 3             | NM_005075,<br>NM_021094 | GAGACATCCATTGGAAC<br>GGG       | CAGGTCCTTTGTGCGCAC<br>AGC    | AAACATGGTGTTCAAAA<br>TTGCAGCTG   |
| 10599 | SLC21A6  | LST-1, OATP2,<br>OATP-C                                  | solute carrier family 21 (organic anion transporter), member 6             | NM_006446               | TGGGCTTGTCTTCAATGT<br>TAAGAGTC | TTTGCTTCATCCATGACA<br>CTTCC  | TCAAGAGAAAGATATCA<br>ATGCATCAGA  |
| 11309 | SLC21A9  | OATPB, OATP-B,<br>KIAA0880                               | solute carrier family 21 (organic anion transporter), member 9             | NM_007256               | CTCCGAAACCGGTTTCAT<br>CG       | TTGCCTCTTTGTCCTGCT<br>GC     | TGCTTCGCCTTAGTTTTG<br>GCTGTCCTGA |
| 9356  | SLC22A6  | OAT1, PAHT,<br>ROAT1                                     | solute carrier family 22 (organic anion transporter), member 6             | NM_004790               | CAGCGCTGTCACTGTCC<br>TCC       | CTGAGGCCTGCAGTGGG<br>AC      | AGAGACCCTGGGCCAGC<br>CACTGC      |
| 10864 | SLC22A7  | NLT, OAT2                                                | solute carrier family 22 (organic anion transporter), member 7             | NM_006672               | CGGCCTTGCTAGATGGA<br>GTG       | TCCACGTCTGGATGGT<br>CTC      | TGTCAGTGCCTAAGCTT<br>ACTTATGGGGG |
| 9376  | SLC22A8  | OAT3                                                     | solute carrier family 22 (organic anion transporter), member 8             | NM_004254               | GGTCAGTCACTGCCTCT<br>GGC       | CTGCTTTGGCTTCTTTGC<br>CC     | CTGGGCCAGGGCTTTT<br>CCTTAGCTCT   |
| 788   | SLC25A20 | CAC, CACT                                                | solute carrier family 25 (carnitine/acylcarnitine translocase), member 20  | NM_000387               | GCTGATCCGGGATGAAG<br>GAG       | TGGCAACTTCAAAGCCA<br>AGG     | ATGCAGTGATGATCCGA<br>GCCTTCCCAG  |
| 6531  | SLC6A3   | DAT1                                                     | solute carrier family 6 (neurotransmitter transporter, dopamine), member 3 | NM_001044               | GGGTCATCGCCACATCC<br>TC        | TCTCTCGAAAGGACCCA<br>GGC     | TGGTGCCCATCTATGCG<br>GCCTACAAGT  |
| 6616  | SNAP25   | SNAP, SNAP-25,<br>FLJ23079,<br>bA416N4.2,<br>dJ1068F16.2 | synaptosomal-associated protein, 25kD                                      | NM_003081               | TAGAGCAGGTGAGCGGC<br>ATC       | TCCTGTGATCTGGCGA<br>TTC      | ACATGGCCCTGGATATG<br>GGCAATGAGA  |
| 6622  | SNCA     | PD1, NACP, PARK1                                         | synuclein, alpha (non A4 component of amyloid precursor)                   | NM_000345,<br>NM_007308 | AAGGAGGGAGTTGTGGC<br>TGC       | TTGGAGCCTACATAGAG<br>AACACCC | GGGTGTGGCAGAAGCA<br>GCAGGAAAGAC  |
| 6646  | SOAT1    | ACAT, SOAT, STAT,<br>ACACT, ACAT1                        | sterol O-acyltransferase (acyl-Coenzyme A: cholesterol acyltransferase) 1  | NM_003101               | AATGGTATGCACGTCGG<br>CAC       | CGTAACGACAAGTCCAG<br>GAACG   | CCCACATTTTTGGATTAT<br>GTCCGGCCA  |
| 8435  | SOAT2    | ACAT2, ARGP2                                             | sterol O-acyltransferase 2                                                 | NM_003578               | TTCATGATGCATGACCA<br>GCG       | AGGCTGACCTGGATTCC<br>CTG     | ATGGAACGTGCTGATGT<br>GGACCATGCT  |

|       |         |                                           |                                                                                                      |                      |                       |                          |                                |
|-------|---------|-------------------------------------------|------------------------------------------------------------------------------------------------------|----------------------|-----------------------|--------------------------|--------------------------------|
| 6647  | SOD1    | ALS, ALS1                                 | superoxide dismutase 1, soluble (amyotrophic lateral sclerosis 1 (adult))                            | NM_000454            | AAGATGGTGTGGCCGATGTG  | TTCATGGACCACCAGTGTGC     | TCTCAGGAGACCATTGCATCATTGGCC    |
| 6648  | SOD2    | MNSOD                                     | superoxide dismutase 2, mitochondrial                                                                | NM_000636            | TTGCTGCTTGTCCAAATCAGG | CGTGCTCCCACACATCAATC     | GGAACAACAGGCCTTAT TCCACTGCTGGG |
| 6649  | SOD3    |                                           | superoxide dismutase 3, extracellular                                                                | NM_003102            | AACCAGGCCAGCGTGGA G   | TGCGCTCTGAGTGCTCC C      | CTGCTGCGTGGTGGGCG TGTG         |
| 25928 | SOSTDC1 | CDA019, DKFZp564D206, ECTODIN, USAG1      | sclerostin domain containing 1                                                                       | AL050024             | AATCCAGCTGCAGTGCC AAG | ACTGGACTCGTTGTGCT GCC    | GGCAGCACACGCACCTA CAAAATCACA   |
| 6678  | SPARC   | ON                                        | secreted protein, acidic, cysteine-rich (osteonectin)                                                | NM_003118            | ACGGGTACCTCTCCAC ACC  | TTGTCCAGGTCACAGGT CTCG   | ATGAGCATTGCACCAC CCGCTTTTT     |
| 6696  | SPP1    | OPN, BNSP, BSPI, ETA-1                    | secreted phosphoprotein 1 (osteopontin, bone sialoprotein I, early T-lymphocyte activation 1)        | NM_000582            | GCAATGAGCATTCCGAT GTG | GGCTGTGAAATTCATGG CTG    | TCAGGAACTTTCCAAAGT CAGCCGTGA   |
| 6713  | SQLE    |                                           | squalene epoxidase                                                                                   | NM_003129            | TGCTGTTGCAATCTATGC CG | GCACTACTACTGAGAAG GGCTCG | TTTTGCTTTAAGTCAGAA CCTTGATT    |
| 6715  | SRD5A1  |                                           | steroid-5-alpha-reductase, alpha polypeptide 1 (3-oxo-5 alpha-steroid delta 4-dehydrogenase alpha 1) | NM_001047            | AGTGGTGTGGCTATGCC CTG | TTTGGATACTCTTCAAAT TTCCG | GC GCGGCTTTTGCTTTC TTCACGTTTT  |
| 6720  | SREBF1  | SREBP1                                    | sterol regulatory element binding transcription factor 1                                             | NM_004176            | GCTGCTGGCCTCCTGCT AC  | CCAAGCTTCTCGAGTGT GCG    | GTGGGCATGCTGGCTGA GGCG         |
| 6805  | STX1B   |                                           | syntaxin 1B                                                                                          | NM_003163            | CGCCGTATCCGACACCA AG  | TATAGGCCCAAAGTGCA CCC    | AAAGCCGTTAAGTACCA AAGCAAAGCC   |
| 9899  | SV2B    | HsT19680, KIAA0735                        | synaptic vesicle protein 2B homolog                                                                  | NM_014848            | CCAACCAGAGAGCAACA GCC | GCAGCAGCCAGAAGGAT GG     | ATTATGCAAATTTGGCGC CATCCTGGG   |
| 6853  | SYN1    | SYN1, SYN1a, SYN1b                        | synapsin I                                                                                           | NM_006950            | CCCAGCTCAACAAATCC CAG | GGCGAAAGACTTCTCA GGC     | TCTCTGACCAATGCCTTC AACCTT      |
| 6890  | TAP1    | APT1, PSF1, ABC17, ABCB2, RING4, D6S114E  | transporter 1, ATP-binding cassette, sub-family B (MDR/TAP)                                          | NM_000593            | CTGTACGAAAGCCCTGA GCG | CATGAGCTGCTGGTGGG TTC    | GCTTCTCATCACCCAGC ACCTCAGCCT   |
| 6891  | TAP2    | APT2, PSF2, ABC18, ABCB3, RING11, D6S217E | transporter 2, ATP-binding cassette, sub-family B (MDR/TAP)                                          | NM_000544, NM_018833 | CTGCCACGCAGATGAC TTC  | ACGTTGTTTCTGTCCCG CAG    | ATGTAGGGGAGAAGGGA AGCCAGCTGG   |
| 7035  | TFPI    | LACI                                      | tissue factor pathway inhibitor (lipoprotein-associated coagulation inhibitor)                       | NM_006287            | GGAAATGCCGCCCATTT AAG | CATGCCCTCAGACATTC TTG    | CAGTGGATGTGGGGGAA ATGAAAACAA   |
| 7039  | TGFA    |                                           | transforming growth factor, alpha                                                                    | NM_003236            | CTTGGTGGTGGTCTCCA TCG | GCGGTTCTTCCCTTCAG GAG    | ACTGCTGCCAGGTCCGA AAACACTGTG   |

|       |        |                           |                                                                                                  |           |                          |                           |                                |
|-------|--------|---------------------------|--------------------------------------------------------------------------------------------------|-----------|--------------------------|---------------------------|--------------------------------|
| 7046  | TGFBR1 | ALK-5, ACVRLK4            | transforming growth factor, beta receptor I (activin A receptor type II-like kinase, 53kD)       | NM_004612 | TCCCAAACAGATGGCAG AGC    | AATCCGCAATGCTGTAA GCC     | GAGAATGTTGGTATGCC AATGGAGCAGC  |
| 7048  | TGFBR2 | HNPCC6                    | transforming growth factor, beta receptor II (70-80kD)                                           | NM_003242 | GACTGAGTGCTGGGACC ACG    | GGGAGCCGTCTTCAGGA ATC     | CCAGTGTGTGGCAGAAC GCTTCAGTGA   |
| 7054  | TH     | TYH                       | tyrosine hydroxylase                                                                             | NM_000360 | TCAGGAGCTATGCCTCA CGC    | GCAAGGGTGTCCAGCTC ATC     | CTCCGTGAAGTTCGACC CGTACACGCT   |
| 7076  | TIMP1  | EPA, EPO, HCl, CLGI, TIMP | tissue inhibitor of metalloproteinase 1 (erythroid potentiating activity, collagenase inhibitor) | NM_003254 | GACCAGCTCCTCCAAGG CTC    | CTATCTGGGACCGCAGG GAC     | AAAAGGGCTTCCAGTCC CGTACACCTTG  |
| 7077  | TIMP2  |                           | tissue inhibitor of metalloproteinase 2                                                          | NM_003255 | CCCGTGCTACATCTCCT CCC    | TCACTTCTCTTGATGCAG GCG    | GTGCCTCTGGATGGACT GGTACACAGA   |
| 7078  | TIMP3  | SFD, HSMRK222             | tissue inhibitor of metalloproteinase 3 (Sorsby fundus dystrophy, pseudoinflammatory)            | NM_000362 | CCAATTTTCGGTTACCCT GGC   | GGGTCTGTGGCATTGAT GATG    | AGAAGGGCGGCTACTGC AGCTGGTACC   |
| 7079  | TIMP4  |                           | tissue inhibitor of metalloproteinase 4                                                          | NM_003256 | CCCTAACGAGTGCCTCT GGAC   | AGGTGCCGTCAACATGC TTC     | CTGGCTGTTGGAACGAA AGCTCTATGG   |
| 81793 | TLR10  |                           | toll-like receptor 10                                                                            | NM_030956 | TGGAATGGCCCAAGGAT AGG    | TGCAGTTCATACATTTCT CTGGTG | GTGGGCTTTTCTGGGCA AACCTTCGAG   |
| 7097  | TLR2   | TIL4                      | toll-like receptor 2                                                                             | NM_003264 | TCATTCTTCTGGAGCCC ATTG   | TGGGCCACTCCAGGTAG GTC     | AGCGCTTCTGCAAGCTG CGGAAGATAA   |
| 7098  | TLR3   |                           | toll-like receptor 3                                                                             | NM_003265 | GAACCATGCACTCTGTTT GCG   | CGAAAGGCACCTATCCG TTC     | TCTCACTGCATCTTGAAC TGGCCAGTT   |
| 7099  | TLR4   | hToll                     | toll-like receptor 4                                                                             | NM_003266 | GAAGACCCTGCTCAGGC AGC    | CGTCTCCAGAAGATGTG CCG     | ACCTGGAGTGGGAGGAC AGTGTCCCTGG  |
| 7100  | TLR5   | TIL3                      | toll-like receptor 5                                                                             | NM_003268 | GGTCCTTGTCCCAGTAC CAGTTG | CCTGGAGATCCTCAGGC CAC     | TCCATCAGAGGCTTTGT ACAGAAACAGCA |
| 10333 | TLR6   |                           | toll-like receptor 6                                                                             | NM_006068 | CATTCCACAGAACAGCA TTCCC  | CCTTGGGCCACTGCAAA TAAG    | CCACAAGCTGAAGGCTC TCATGACGCA   |
| 51284 | TLR7   |                           | toll-like receptor 7                                                                             | NM_016562 | TCCAAGTTCCTCCAGCT CCG    | GTGGCCAGGGCGTTCTT TAG     | CCAACAAACCCGCAAGC TCACCCATAC   |
| 51311 | TLR8   |                           | toll-like receptor 8                                                                             | NM_016610 | CCTGCTGGAGCCAGTGT TACAG  | AACAAGCCTTCTGCCTT CGG     | CGGACGCGATCTGTAA GAGCTCCATC    |
| 54106 | TLR9   |                           | toll-like receptor 9                                                                             | NM_017442 | TGGTGATCCTGAGCCCT GAC    | AGAGGAGGACACTCTGG CCG     | CGCTCCCGCTACGTGCG GCT          |
| 9168  | TMSB10 |                           | thymosin, beta 10                                                                                | NM_021103 | GCTTCGATAAGGCCAAG CTG    | TTTCACTCCGCTTCTCCT GC     | ACACCCTGCCACCAAA GAGACCATTG    |
| 7114  | TMSB4X | TB4X, PTMB4, TMSB4        | thymosin, beta 4, X chromosome                                                                   | NM_021109 | TGACAAACCCGATATGG CTG    | ATTGCGCTGCTTGCTTCT CC     | CGCAAGAGAAAAATCCA CTGCCTTCCA   |
| 7124  | TNF    | DIF, TNFA, TNFSF2         | tumor necrosis factor (TNF superfamily, member 2)                                                | NM_000594 | TCCTCTTGCCATCAAG AGCC    | GTGGTCCACCCTTCTCC AGC     | GCCCATCTATCTGGGAG GGTCTTCCA    |

|       |           |                                                                                     |                                                                                                          |           |                                 |                             |                                  |
|-------|-----------|-------------------------------------------------------------------------------------|----------------------------------------------------------------------------------------------------------|-----------|---------------------------------|-----------------------------|----------------------------------|
| 7128  | TNFAIP3   | A20, TNFA1P2                                                                        | tumor necrosis factor, alpha-induced protein 3                                                           | NM_006290 | TGCATGGAGTGTGAGCA<br>TCC        | TGCAGTAGCCGTTGCAC<br>TTG    | CCCCGCCTGTGATCATT<br>TTGGCAAT    |
| 8797  | TNFRSF10A | DR4, APO2,<br>TRAILR1, TRAILR-1                                                     | tumor necrosis factor receptor superfamily, member 10a                                                   | NM_003844 | GGATGCCTTGGAGAGGA<br>TGG        | TCACTCCAAGGACACGG<br>CAG    | TCAGGACCTCTTGGTGG<br>ACTCTGGAAA  |
| 8795  | TNFRSF10B | DR5, KILLER,<br>TRICKB, TRAILR2,<br>TRICK2A, TRICK2B,<br>TRAIL-R2,<br>KILLER/DR5    | tumor necrosis factor receptor superfamily, member 10b                                                   | NM_003842 | CGAGATGCCTCTGTCCA<br>CAC        | TCCAGAGCTCAACAAGT<br>GGTCC  | GGAGACGCTGGGAGAG<br>AGACTTGCCAA  |
| 8793  | TNFRSF10D | DCR2, DcR2,<br>TRUNDD, TRAILR4                                                      | tumor necrosis factor receptor superfamily, member 10d, decoy with truncated death domain                | NM_003840 | TCGGCAACACTGGAAGA<br>AGG        | AGGCAGGACGTAGCAGA<br>GCC    | CCAACTGGTGGGCTCCG<br>AAAAGCTCTT  |
| 4982  | TNFRSF11B | OPG, TR1, OCIF                                                                      | tumor necrosis factor receptor superfamily, member 11b (osteoprotegerin)                                 | NM_002546 | CTTGAAGGGCCTAATGC<br>ACG        | TGTGAAGGAACCTGATG<br>GTC    | GCACTCAAAGACGTACC<br>ACTTTCCCAA  |
| 8718  | TNFRSF12  | DR3, TR3, APO3,<br>DDR3, LARD,<br>WSL1, APO-3,<br>TRAMP, WSL-1,<br>WSL-LR           | tumor necrosis factor receptor superfamily, member 12 (translocating chain-association membrane protein) | NM_003790 | AGATCGAAGCCGTGGAG<br>GTG        | AGTCTTCCACGCAGCCG<br>TC     | CAGCAGTACGAGATGCT<br>CAAGCGCTGG  |
| 7132  | TNFRSF1A  | FPP, p55, TNF-R,<br>TNFAR, TNFR1, p55-<br>R, CD120a,<br>TNFR60, TNF-R-I,<br>TNF-R55 | tumor necrosis factor receptor superfamily, member 1A                                                    | NM_001065 | CGCGAGGCGCAATACAG               | AGCCCAGCAGGTCCATG<br>TC     | GCCACGCTGGAGCTGCT<br>GGGAC       |
| 7133  | TNFRSF1B  | P75, TNFBR,<br>TNFR2, CD120b,<br>TNFR80, TNF-R75,<br>p75TNFR, TNF-R-II              | tumor necrosis factor receptor superfamily, member 1B                                                    | NM_001066 | AGGAGGAATGTGCCTTT<br>CGG        | CATCCCAGCATCAGGCA<br>CTC    | TCACAGCTGGAGACGCC<br>AGAGACCCT   |
| 27242 | TNFRSF21  | DR6                                                                                 | tumor necrosis factor receptor superfamily, member 21                                                    | NM_014452 | GAGGAGCTGCGGGTGAT<br>TG         | AGAGTCCAGGAGGGTCT<br>GGC    | CCCCAGGCTGAGGACAA<br>ACTAGACCGG  |
| 958   | TNFRSF5   | p50, Bp50, CD40                                                                     | tumor necrosis factor receptor superfamily, member 5                                                     | NM_001250 | CTTCCTGGCTCCAACAC<br>TGC        | CTCTTTGCCATCCTCCTG<br>GG    | GCAGGAGACTTTACATG<br>GATGCCAACCG |
| 355   | TNFRSF6   | FAS, APT1, CD95,<br>APO-1                                                           | tumor necrosis factor receptor superfamily, member 6                                                     | NM_000043 | TCAACTGCTTCGTAATTG<br>GCATC     | CTGCAAGAGTACAAAGA<br>TTGGC  | TCATGGAAAGAAAGAAG<br>CGTATGACACA |
| 8743  | TNFSF10   | TL2, APO2L, TRAIL,<br>APO-2L                                                        | tumor necrosis factor (ligand) superfamily, member 10                                                    | NM_003810 | TGGTCTAAAGATGCAGA<br>ATATGGACTC | TGGTCCATGTCTATCAA<br>GTGCTC | TCCATCTATCAAGGGGG<br>AATATTTGAGC |

|      |         |                                                  |                                                                           |                      |                          |                               |                                  |
|------|---------|--------------------------------------------------|---------------------------------------------------------------------------|----------------------|--------------------------|-------------------------------|----------------------------------|
| 8600 | TNFSF11 | ODF, OPGL, RANKL, TRANCE, hRANKL2                | tumor necrosis factor (ligand) superfamily, member 11                     | NM_003701, NM_033012 | CCTGATGAAAGGAGGAA GCACC  | TCCGGATCCAGTAAGGA GGG         | CGGTCTGGAGAGGAAAT CAGCATCGAG     |
| 356  | TNFSF6  | FASL, APT1LG1                                    | tumor necrosis factor (ligand) superfamily, member 6                      | NM_000639            | GTGGGCCCCGAGCAG          | CCAGAGAGAGCTCAGAT ACGTTGAC    | TGGGGGCAGTGTTCAAT CTTACCAGTGC    |
| 7157 | TP53    | P53, p53                                         | tumor protein p53 (Li-Fraumeni syndrome)                                  | NM_000546            | TGAGCGCTTCGAGATGT TCC    | TTCAGGTGGCTGGAGTG AGC         | ATGAGGCCTTGGAACTC AAGGATGCC      |
| 7158 | TP53BP1 | 53BP1                                            | tumor protein p53 binding protein, 1                                      | NM_005657            | TTGATGTGGTGGTGACG GAC    | TGAGGCACTGGATCACC CAC         | TGAAGTGTGCTGAAGCA TTGCAGCTGC     |
| 7177 | TPSB1   | TPS1, TPS2                                       | tryptase beta 1                                                           | NM_003294            | GGAACACCCGGAGGGA CTC     | ACACGGGTGTAGATGCC AGG         | CTGGTGTGCAAGGTGAA TGGCACCTG      |
| 7186 | TRAF2   | TRAP, TRAP3                                      | TNF receptor-associated factor 2                                          | NM_021138            | GACATGAACATCGCAAG CGG    | CCTGTCAGGTCCACAAT GGC         | AGGCAAAGAATTCCTAC GTGCGGGACG     |
| 9618 | TRAF4   | CART1, MLN62                                     | TNF receptor-associated factor 4                                          | NM_004295            | CACCAGGACATTCGAAA GCG    | TCAGCTGAGGATCTTCC GGG         | GGGATGATGCAGTCTTC ATCCGTGCTG     |
| 7189 | TRAF6   | <a href="#">MGC:3310</a> , <a href="#">RNF85</a> | TNF receptor-associated factor 6                                          | NM_004620            | CTTTCAGCGACCCACA ATC     | TACCCATGTCAAAGCGG GTG         | CCACGGAACCCAAAAGG TTTTGGCTATG    |
| 7201 | TRHR    | <a href="#">MGC141920</a>                        | thyrotropin-releasing hormone receptor                                    | NM_003301            | TGTGGCCCTAAATTACA GCGTC  | CCTCAGAAGCCAAGCAG GTG         | GGAGTCAGACCATTTCA GCACAGAGCTTGA  |
| 7276 | TTR     | PALB                                             | transthyretin (prealbumin, amyloidosis type I)                            | NM_000371            | CACCAAATCTTACTGGAA GGCAC | CGGAGTCGTTGGCTGTG AATAC       | CTCCCCATTCCATGAGC ATGCAGAGGT     |
| 7350 | UCP1    | UCP, SLC25A7                                     | uncoupling protein 1 (mitochondrial, proton carrier)                      | NM_021833            | GTGTGCCCAACTGTGCA ATG    | TCCAGGATCCAAGTCGC AAG         | GACCAACGGCTTTCTTC AAGGGGTTGG     |
| 7351 | UCP2    | UCPH, SLC25A8                                    | uncoupling protein 2 (mitochondrial, proton carrier)                      | NM_003355            | TCCTTTCTCCGCTTGGGT TC    | GAAGTGCAGGCAGCCAT GAG         | CGTCACCTATGAGCAGC TGAACGAGCC     |
| 7352 | UCP3    | SLC25A9                                          | uncoupling protein 3 (mitochondrial, proton carrier)                      | NM_003356, NM_022803 | GCTGCTGGACTATCACC TGCTC  | TACCGGGTCTTCACCAC GTC         | CTTTGTCTCTGCCTTTGG AGCCGGCTT     |
| 6844 | VAMP2   | SYB2, VAMP-2                                     | vesicle-associated membrane protein 2 (synaptobrevin 2)                   | NM_014232            | TGGAGCGAGACCAGAAG CTG    | TATTTGCGCTTGAGCTTG GC         | AGCTGGACGACCCTGCA GATGCACT       |
| 7412 | VCAM1   | INCAM-100                                        | vascular cell adhesion molecule 1                                         | NM_001078            | TTCTCCTGAGCTTCTCGT GCTC  | TCTGTGCTTCTACAAGAC TATATGACCC | TGCATCCTCCTTAATAAT ACCTGCCATTGGA |
| 7422 | VEGF    | VEGFA                                            | vascular endothelial growth factor                                        | NM_003376            | ATCCCTGTGGGCCTTGC TC     | CCTCGGCTTGTACATC TGC          | TCCTGCAAAAACACAGA CTCGCGTTGC     |
| 7448 | VTN     | V75, VNT                                         | vitronectin (serum spreading factor, somatomedin B, complement S-protein) | NM_000638            | CTGCCACCTGTGAACCC ATC    | GGTCCACAGTGTCCACT CGC         | GTACTACCGAGTCAATC TTCGCACACG     |
| 7474 | WNT5A   | hWNT5A                                           | wingless-type MMTV integration site family, member 5A                     | NM_003392            | CGACCAGTTCAAGACCG TGC    | CCACGATCTCCGTGCAC TTC         | TCCACTGGTGCTGCTAC GTCAAGTGCA     |

|      |      |             |                         |           |                          |                           |                                 |
|------|------|-------------|-------------------------|-----------|--------------------------|---------------------------|---------------------------------|
| 7494 | XBP1 | XBP2, TREB5 | X-box binding protein 1 | NM_005080 | GGGCATTCTGGACAACT<br>TGG | AAGGAACTGGGTCCTTC<br>TGGG | TTCTTCAAATGCCCTTCC<br>CCAGAGCCT |
|------|------|-------------|-------------------------|-----------|--------------------------|---------------------------|---------------------------------|

### ADDITIONAL INTERFERON-STIMULATED GENES (HUMAN)

| Gene ID | Gene Symbol | Gene Aliases                         | Gene Description                       | Forward Primer                | Reverse Primer                | Probe                                |
|---------|-------------|--------------------------------------|----------------------------------------|-------------------------------|-------------------------------|--------------------------------------|
| 2537    | IFI6        | 6-16, FAM14C, G1P3, IFI-6-16, IFI616 | interferon alpha-inducible protein 6   | CGCTGCTGTGCCCATC<br>TATC      | AAAGCGATACCGCCTT<br>CTGC      | TCTCCTCCAAGGTCTA<br>GTGACGGAGCCC     |
| 3428    | IFI16       | IFNGIP1, MGC9466, PYHIN2             | interferon, gamma-inducible protein 16 | TACAGGGAAGATGGAA<br>GTGGTGG   | TTTCGGTGCCAATTCA<br>AAGC      | TGCATGGACGACTGAA<br>CACAATCAACTG     |
| 10561   | IFI44       | MTAP44, p44                          | interferon-induced protein 44          | CAATTATTCCTCTGAGT<br>GGGAGCTG | ATCCTCTAAGAAGTCAT<br>CTGCAGCC | TGTTCTAATTCTTTCTG<br>CTCTGAGACGAATGC |
| 3661    | IRF3        |                                      | interferon regulatory factor 3         | CTCAGGGCCTTGGTAG<br>AAATGG    | AGGTGAGGGAGAGTG<br>GGTGG      | CCCTGGAGAATACTGT<br>GGACCTGCACA      |
| 10379   | IRF9        | ISGF3, ISGF3G, p48                   | interferon regulatory factor 9         | CCATCTCCTGGAATGC<br>ACCC      | CTGCAGAAGTAGGCGG<br>TTCTG     | AAGAGCTCCACGCACT<br>CGTTGCTGG        |
